1 **Surfactin stimulated by pectin molecular patterns and root exudates acts as a**  
2 **key driver of *Bacillus*-plant mutualistic interaction**

3 Grégory Hoff<sup>1#</sup>, Anthony Arguelles-Arias<sup>1</sup>, Farah Boubsi<sup>1</sup>, Jelena Prsic<sup>1</sup>, Thibault Meyer<sup>1\*</sup>,  
4 Heba M. M. Ibrahim<sup>2</sup>, Sebastien Steels<sup>1</sup>, Patricio Luzuriaga<sup>1</sup>, Aurélien Legras<sup>1</sup>, Laurent  
5 Franzil<sup>1</sup>, Michelle Lequart<sup>3</sup>, Catherine Rayon<sup>3</sup>, Victoria Osorio<sup>4</sup>, Edwin de Pauw<sup>4</sup>, Yannick  
6 Lara<sup>5</sup>, Estelle Deboever<sup>6</sup>, Barbara de Coninck<sup>2</sup>, Philippe Jacques<sup>1</sup>, Magali Deleu<sup>6</sup>, Emmanuel  
7 Petit<sup>3</sup>, Olivier Van Wuytswinkel<sup>3</sup>, Marc Ongena<sup>1</sup>

8 <sup>1</sup> Microbial Processes and Interactions, TERRA Teaching and Research Center, BioEcoAgro, Joint Research Unit/UMR  
9 transfrontalière 1158, University of Liège - Gembloux Agro-Bio Tech, Gembloux, Belgium

10 <sup>2</sup> Division of Plant Biotechnics, Department of Biosystems, Faculty of Bioscience Engineering, KU Leuven, Leuven, Belgium

11 <sup>3</sup> Unité Biologie des Plantes et Innovation, BioEcoAgro, Joint Research Unit/UMR transfrontalière 1158, Université de  
12 Picardie Jules Verne, UFR des Sciences, Amiens, France

13 <sup>4</sup> Mass Spectrometry Laboratory, MolSys Research Unit, Department of Chemistry, University of Liège, Liège, Belgium

14 <sup>5</sup> Astrobiology, UR-ASTROBIOLOGY, Geology Department, University of Liège, Liège, Belgium

15 <sup>6</sup> Molecular Biophysics at Interfaces Laboratory, Gembloux Agro-Bio Tech, University of Liège, Gembloux, Belgium

16 Corresponding authors: Grégory Hoff [g.hoff@uu.nl](mailto:g.hoff@uu.nl)  
17 Marc Ongena [marc.ongena@uliege.be](mailto:marc.ongena@uliege.be)

18 # Current address: Ecology and Biodiversity, Department of Biology, Utrecht University, Padualaan 8, 3584 CH, Utrecht, The  
19 Netherlands

20 \* Current address: UMR Ecologie Microbienne, F-69622, University of Lyon, Université Claude Bernard Lyon 1, CNRS, INRAE,  
21 VetAgro Sup, Villeurbanne, France

22

23

24 **Abstract**

25 *Bacillus velezensis* is considered as model species belonging to the so-called *B. subtilis*  
26 complex that typically evolved to dwell in the soil rhizosphere niche and establish intimate  
27 association with plant roots. This bacterium provides protection to its natural host against  
28 diseases and represents one of the most promising biocontrol agents. However, the  
29 molecular basis of the cross-talk that this bacterium establishes with its natural host has  
30 been poorly investigated. We show here that these plant-associated bacteria have evolved  
31 some polymer-sensing system to perceive their host and that in response, they increase the  
32 production of the surfactin-type lipopeptide. Furthermore, we demonstrate that surfactin  
33 synthesis is favoured upon growth on root exudates and that this lipopeptide is a key  
34 component used by the bacterium to optimize biofilm formation, motility and early root  
35 colonization. In this specific nutritional context, the bacterium also modulates qualitatively  
36 the pattern of surfactin homologues co-produced *in planta* and mainly forms variants that  
37 are the most active at triggering plant immunity. Surfactin represents a shared good as it  
38 reinforces the defensive capacity of the host.

39

40

## 41 Introduction

42 Soil is among the richest ecosystems in terms of microbial diversity, but only a subset  
43 of these microbes has evolved to efficiently establish in the competitive and nutrient-  
44 enriched rhizosphere layer surrounding plant roots [1]. The rhizosphere includes plant  
45 beneficial bacteria dwelling on the rhizoplane as multicellular biofilm communities, feeding  
46 on exuded carbohydrates [2,3], and, in turn, contributing to host fitness via growth  
47 stimulation and protection against phytopathogens [4,5]. This biocontrol activity is mediated  
48 via competition for nutrients and space, direct growth inhibition of the pathogenic  
49 (micro)organisms and more indirectly, by stimulating the host defensive capacity in an  
50 immunization-like process which leads to induced systemic resistance (ISR, [6,7]). This ISR  
51 mechanism results in enhanced defense lines and reduced disease symptoms upon  
52 perception of plant beneficial microbes [6,8].

53 From an ecological viewpoint, rhizosphere establishment and persistence of these  
54 beneficial bacteria rely on various traits but efficient root colonization and high  
55 competitiveness toward the surrounding microbiological network are pivotal. It is  
56 hypothesized that the potential to produce a wide range of chemically diverse and bioactive  
57 secondary metabolites (BSMs) acting as signals and/or antimicrobials is a common key  
58 feature of these beneficial bacteria [5,9,10]. Members of the *Bacillus velezensis* species are  
59 considered as archetypes of plant-associated beneficial bacilli and are among the most  
60 prolific BSMs producers with more than 12% of their genome devoted to the synthesis of  
61 compounds contributing to both ecological competence and biocontrol activity [11-15].  
62 Among their BSM arsenal, the cyclic lipopeptide surfactin, is synthesized non-ribosomally by  
63 a multi-modular mega-enzyme machinery (encoded by the *urfA* operon) and is formed as a  
64 mix of naturally co-produced homologues varying in the length of the fatty acid chain. This  
65 multifunctional compound is of particular interest because it retains important roles in key  
66 developmental processes such as bacterial motility, biofilm formation and root colonization  
67 [16-18], but also because it represents the best described *Bacillus* triggers for plant immunity  
68 [6,8]. The potential of surfactin to stimulate ISR has been demonstrated on various plants  
69 including Solanaceae like tobacco and tomato on which it acts as main if not sole elicitor  
70 formed by *B. subtilis* and *B. velezensis* species [10,19]. In support to its key role in interaction  
71 with the host plant, we also previously reported that surfactin is promptly formed in the

72 course of early colonization and that its production is stimulated upon sensing root tissues  
73 [20].

74 However, in contrast to the well-studied interactions between plants and microbial  
75 pathogens or nitrogen-fixing bacteria [21], relatively little is known on the molecular basis of  
76 cooperative interactions between plants and beneficial bacteria such as *B. velezensis*  
77 [11,20,22]. More specifically, how and to what extent the expression of key bacterial BSMs may  
78 be modulated by plant factors is poorly understood. A better knowledge is not only critical  
79 for providing new insights in rhizosphere chemical ecology but also for optimizing the use of  
80 these species as biocontrol agents, which still suffer from insufficient efficacy in practice [23].  
81 Here, we investigated the molecular interaction driving the early steps of partnership  
82 establishment between plant roots and *B. velezensis*. We show that cell wall pectin acts in  
83 synergy with soluble root exudates as plant host cues perceived by *B. velezensis*. In  
84 response, the bacterium stimulates the production of specific surfactin variants as key  
85 components of its secretome to further improve the fitness of both partners *i.e.* early root  
86 colonization and thus rhizosphere competence of the bacterium and priming of immunity in  
87 the host plant.

88

89

## 90 Results

### 91 Pectin fragments of high polymerization degree act as host cues triggering surfactin 92 production

93 We previously described that early production of surfactin (as a mix of naturally co-  
94 produced homologues varying in the length of the fatty acid chain, Fig. 1) is stimulated in  
95 contact with root tissues and several plant cell wall-associated polymers (PCWP) [20]. In this  
96 work, we further investigated this phenomenon focusing on the impact of pectin, as it  
97 represents complex sugar polymers typically found in the plant primary cell wall and  
98 particularly abundant in the middle lamella layer [24]. We first tested the effect of crude  
99 pectin extracted from tobacco root PCWP (referred as cPec, Supplementary Fig. 1 for  
100 composition and related structure). An 8-fold increase of surfactin production was detected  
101 at the early exponential growth phase ( $OD_{600}=0.2-0.25$ ) in *B. velezensis* GA1 liquid cultures  
102 supplemented with cPec compared to an un-supplemented culture (Fig. 1ab). Surfactin  
103 production was also 10 times enhanced upon addition at the same concentration of pure  
104 commercially available homogalacturonan (HG) with high degree of polymerization (DP)  
105 (Supplementary Fig. 2) but low level of methyl-esterification (HGLM) according to the  
106 manufacturer (Fig. 1b). HG was tested as the most abundant pectic polysaccharide  
107 constituent, which represents 65% of crude primary cell wall pectin [24]. Production of this  
108 lipopeptide was also enhanced to a similar level upon addition of highly methylated HG  
109 (HGHM), showing that the degree of methyl-esterification of the polymer is not a major trait  
110 influencing perception by the bacterium (Supplementary Fig. 3). Altogether, this supports a  
111 key role of the pectin backbone as plant molecular pattern that is sensed by the bacterium  
112 to stimulate surfactin synthesis.

113 Interestingly, by screening the CAZy database [25] for genes encoding carbohydrate-  
114 active enzymes potentially involved in PCWP degradation by *B. velezensis*, two putative  
115 pectate/pectin lyases encoding genes were detected. These two genes, referred as *pelA* and  
116 *pelB* (accessions *GL331\_08735* and *GL331\_04125* in *B. velezensis* GA1, respectively), are  
117 highly conserved among all sequenced *Bacillus* genomes that belong to the “Operational  
118 Group *B. amyloliquefaciens*” (Supplementary table 1) [26]. *pelA* and *pelB* are readily  
119 expressed in GA1 *in vitro* and the corresponding enzymes efficiently convert HG into

120 unsaturated oligogalacturonides with consistent activity occurring at the beginning of  
121 stationary phase (Supplementary Fig. 4ab). However, the bacterial perception of oligomers  
122 with lower polymerization degree compared to HG is not obvious since oligogalacturonides  
123 (OG) did not stimulate surfactin biosynthesis (Fig. 1b, Supplementary Fig. 5 for OG  
124 characterization). Supplementation with galacturonic acid (GA) led to a reduction of  
125 surfactin production at mid exponential phase ( $OD_{600}=0.35$ , Supplementary Fig. 6 for growth  
126 curves, Fig. 1c). Surfactin production is thus specifically boosted upon sensing long degree of  
127 polymerization (DP) polymers, but is somehow inhibited in presence of GA constituting the  
128 pectin backbone. Such HG-driven surfactin stimulation also occurs in other *B. velezensis*  
129 isolates tested (FZB42, QST713 and S499) and to a lower extent *B. pumilus* QST 2808. It does  
130 not occur in the non-rhizosphere dwelling isolates *B. amyloliquefaciens* DSM7 or *B. subtilis*  
131 ATCC 21332 (Fig. 1c) suggesting that this trait may be specific to bacilli with a plant-  
132 associated lifestyle.

### 133 **The root nutritional context favors early surfactin production**

134 *Bacillus velezensis* quickly colonize tomato plantlets in a gnotobiotic system and  
135 forms visible biofilm-like structures covering the main root and embedding lateral roots after  
136 24-48h post inoculation (Fig 2a). This is correlated with consistent *urfAA* gene expression and  
137 surfactin production rate in the cell population at these early times but it was maintained  
138 albeit to a lower level, over the investigated timeframe of seven days (Fig. 2ab). Since  
139 surfactin enhancement linked to the perception of the pectin backbone is only transient (Fig  
140 1b), we hypothesized that root exudates, constantly secreted by the plant, may also  
141 positively impact the synthesis of the lipopeptide. Surfactin production rate was thus  
142 compared upon growth in a classical laboratory medium (LB) and in a root exudate-  
143 mimicking medium (REM) reflecting the content of carbohydrates typically released by  
144 tomato or tobacco roots [27]. It revealed an earlier and higher production by cells growing in  
145 REM (Fig 2c). Surfactin production in REM medium is initiated earlier and is more efficient in  
146 *B. velezensis* compared to other closely related but non plant-associated species such as *B.*  
147 *amyloliquefaciens* or *B. subtilis* (Fig. 2d).

148 Addition of HG in REM medium compared to LB revealed a cumulative effect of this  
149 PCWP and root exudates on surfactin production (Fig 3a). This could be of clear ecological

150 benefit for the bacterium since surfactin is known to favor motility of multicellular  
151 communities and biofilm formation [16,28,29]. However, a recent study questioned the real  
152 role of surfactin in these key functions, since its production appears as non-essential for  
153 pellicle biofilm formation in *B. subtilis* NCIB 3610, suggesting a strain dependent role [30]. We  
154 previously reported that motility and biofilm formation are boosted upon growth on root  
155 exudates [27]. Here we show that HG supplementation also favors *B. velezensis* GA1  
156 spreading on low-agar medium (Fig 3b) and early biofilm formation based on pellicle  
157 development at the air-liquid interface [31] (Fig 3c). The role of surfactin in swarming, pellicle  
158 formation and early root colonization was further confirmed for *B. velezensis* GA1. Indeed,  
159 swarming motility on low agar plates was almost reduced to zero in a surfactin deficient  
160 mutant, and the same mutant was more than 3 times less efficient to produce pellicles at  
161 the air liquid interface and to promptly colonize tomato roots after 1 day post inoculation  
162 when compared to the WT (Fig 3def). Collectively, these data allow correlating the positive  
163 impact of PCWP on bacterial motility, biofilm formation and early root colonization through  
164 an anticipated surfactin production in *B. velezensis*.

#### 165 **Surfactin induction by PCWP is not linked to major transcriptional changes.**

166 Both HG and root exudates stimulate surfactin production in GA1. However, while no  
167 activation of the *urfA* biosynthetic gene cluster was observed upon HG addition  
168 (Supplementary Fig. 7), an early and high surfactin gene expression was measured in  
169 *urfAp::gfp* cells growing in REM compared to LB medium (Fig. 4a). To unravel transcriptome  
170 wide changes in GA1 associated with the perception of HG, RNA-sequencing was performed  
171 on cells grown in REM with or without addition of HG and collected at various time points  
172 (lag, early exponential and a mid-exponential phases). The data confirmed that HG  
173 perception is not linked to an increased expression of the *urfA* operon but also revealed a  
174 quite limited and transient transcriptional reprogramming with only 58 genes differentially  
175 expressed over this timeframe (Supplementary table 2). Remarkably, more than 30% of  
176 these genes are involved in stress response or cell wall modifications and are down  
177 regulated in the presence of HG (Fig. 4b). We thus hypothesize that a long-term co-evolution  
178 process may have facilitated *Bacillus* establishment on the roots by the inhibition of a costly  
179 stress response after perception of HG. Addition of HG also leads to a 4.2-fold reduced  
180 expression of *flgM* encoding an inhibitor of SigD, the  $\sigma$  factor involved in the activation of

181 motility related genes [32]. This may contribute to enhanced spreading of multicellular  
182 communities in addition to the positive effect of surfactin mentioned above.

183 **Root exudates drive the bacterium to form surfactin homologues with long fatty acid chain**  
184 **(LFAC) and variants enriched in valine**

185 The NRPS machinery works as an assembly line in which each module is responsible  
186 for recruiting and binding a specific amino acid to the nascent peptide after a first lipo-  
187 initiation step for binding the fatty acid (FA) taken up from the cellular pool (Supplementary  
188 Fig. 8) [33,34]. In that way, surfactin is typically composed of saturated C<sub>12</sub> to C<sub>19</sub>-FA of the  
189 linear, iso or anteiso type of branching [35]. Beside an increased production of surfactin, we  
190 also observed an effect on the pattern of surfactin variants synthesized by *B. velezensis* in  
191 the presence of artificial plant exudates, as well as in naturally produced exudates and in  
192 planta upon root colonization (Supplementary Fig. 9). Indeed, UPLC-MS profiling revealed  
193 that the surfactin pattern produced by GA1 in REM medium is enriched in surfactin *iso*-C<sub>14</sub>  
194 (*i*C<sub>14</sub>) and other variants compared to LB medium (Fig. 5a). They correspond to variants of  
195 the canonical structure with substitution of Leu by Val for the last residue of the cyclic  
196 peptide moiety (Val<sub>7</sub>) and, to a much lower extent, to the same substitution in position 2  
197 (Val<sub>2</sub>, Fig. 5a, see Supplementary Fig. 10). Valine is used both as precursor for the synthesis  
198 of branched fatty acids with an even number of carbons, and as a building block by the NRPS  
199 to form the peptide moiety. Supplementation of the medium with deuterated L-Val-d<sup>8</sup>  
200 resulted in an additional increase in the proportions of surfactin *iso*-C<sub>14</sub> and Val<sub>7</sub> isoforms  
201 labeled at the expected positions in the peptide and in the fatty acid tail (Supplementary Fig.  
202 11). Based on these data, the higher relative proportions of *i*C<sub>14</sub>Val<sub>7</sub> formed in REM, but also  
203 *in planta* (Fig. 5c), most probably result from some enrichment of the intracellular pool in  
204 valine upon growth in the presence of root exudates (Supplementary Discussion). Given the  
205 reduced specificity of NRPS domains involved in selection and activation of leucine at  
206 positions 2 and 7, the megaenzyme would preferably bind valine as it is more available in the  
207 pool.

208 As already described in *B. subtilis* [36,37], the pleiotropic regulator CodY acts as  
209 repressor of surfactin synthesis in *B. velezensis* GA1 as illustrated by the 1.9-fold increase in  
210 production by the  $\Delta codY$  mutant of strain GA1. Interestingly, CodY activity/*codY* expression is



211 also itself negatively impacted by high cellular concentrations in branched chain amino acids  
212 [<sup>38</sup>]. Both quantitative and qualitative changes in surfactin production upon growth in  
213 exudates could therefore be, at least partly, due to a lower CodY activity (Supplementary  
214 Discussion). In support to the role played by this regulator, a similar impact on surfactin  
215 pattern were observed by deleting *codY* in GA1 or by supplementing the culture medium of  
216 the wild-type with valine (Fig. 5d).

## 217 **Long fatty acid chain surfactins act as key triggers of receptor-independent plant immunity**

218 Based on the potential of surfactin as host immunity elicitor [<sup>9,39</sup>], we next wanted to  
219 evaluate the possible relevance of quantitative and qualitative modulation of the surfactin  
220 pattern driven by the plant for its own benefit.

221 Upon application as root treatment, pure surfactin used as mixture of isoforms  
222 formed in REM medium, induced systemic resistance in hydroponically-grown tobacco plants  
223 providing approximatively 45-50% significant disease reduction on leaves subsequently  
224 infected with the pathogen *Botrytis cinerea* (Fig. 6a). The various isoforms were then HPLC-  
225 purified and tested individually revealing that only long fatty acid homologues ( $C_{14}/C_{15}$ )  
226 provided systemic protection to a similar level whereas short fatty acid homologues ( $C_{12}/C_{13}$ )  
227 were inactive (Fig. 6b). Moreover, plant immunization by surfactin is dose-dependent and  
228 concentrations up to 5  $\mu$ M are sufficient to significantly stimulate ISR (Fig. 6c). Interestingly,  
229 such low  $\mu$ M concentration are actually in the range of those that could accumulate in the  
230 root vicinity within a few days upon colonization by GA1 (Supplementary Fig. 12).

231 We next wanted to correlate this systemic protection induced by the lipopeptide  
232 with its potential to trigger locally early immune-related events such as the extracellular  
233 burst in reactive oxygen species (ROS) involved in defense and signaling in pathogen-  
234 triggered immunity (PTI) [<sup>40,41</sup>]. By contrast with flagellin (epitope Flg22), one of the best  
235 characterized Microbe-Associated Molecular Patterns (MAMPs) isolated from bacterial  
236 pathogens, treatment with surfactin did not induced burst in apoplastic ROS in root tissues  
237 (Fig. 6d). However, surfactin-mediated ROS signaling still occurs since a clear cytoplasmic  
238 ROS accumulation was observed (Fig 6e). Little information is available about the spatio-  
239 temporal dynamics of such ROS burst but it may originate from different organelles and has  
240 been occasionally described in response to perception of biotic and abiotic stresses [<sup>42,43</sup>].

241 Using cytoplasmic ROS as marker, the same trend as for ISR tests could be observed  
242 regarding the influence of the structure on the activity of surfactin since long fatty acid  
243 homologues but not short ones efficiently stimulated early immune reaction (Fig 6f). This  
244 means that a single additional methylene group in the fatty acid tail of the molecule (C<sub>14</sub>  
245 versus C<sub>13</sub>) likely determines its immunization potential (Fig 6b,f). By contrast, substitution of  
246 Leu<sup>7</sup> by a Val in the C<sub>14</sub> homologue does not impact activity suggesting that the peptide  
247 moiety is not essential for perception by plant cells. In addition, the  $\mu$ M concentrations  
248 required for optimal eliciting activity of surfactin are very high compared with PAMPs active  
249 in the nM range [44]. Our previous data showed that surfactin elicitation is still active after  
250 treating cells with proteases or after a first application indicating that there is no saturation  
251 of high-affinity but low abundance binding sites on receptors [45,46]. All this indicates that  
252 surfactin is perceived by plant cells via a mechanism independent of high-affinity pattern-  
253 recognition receptors (PRRs) involved in MAMP perception [40,41,44,47,48]. We therefore  
254 postulated that surfactin perception relies on some interaction with the lipid phase of the  
255 plant plasma membrane. Binding experiments via isothermal titration calorimetry and  
256 leakage assays based on the release of fluorescent probe were performed using liposomes  
257 prepared with lipids specific to plant plasma membrane (PLPC/sitosterol/glucosylCeramide).  
258 It revealed that long fatty acid homologues have a higher affinity for these vesicles than the  
259 short fatty acid forms and display a higher destabilizing effect on the lipid bilayer when  
260 added at concentrations of 5  $\mu$ M or higher (Fig. 6gh). These biophysical data thus correlated  
261 well with the contrasting biological activities of longer C<sub>14</sub>/C<sub>15</sub> and shorter C<sub>12</sub>/C<sub>13</sub> surfactin  
262 homologues.

263 A similar cytosolic and dose-dependent ROS signature was observed in tomato roots  
264 upon surfactin treatment (Supplementary Fig. 13). According to the priming concept [49], we  
265 previously showed that ISR triggered by the lipopeptide in that plant as well as in tobacco  
266 and *Arabidopsis*, is not associated with a fast and strong expression of defensive  
267 mechanisms before pathogen infection [20,39]. In order to verify that surfactin elicitation does  
268 not cause a massive release of antimicrobials from plant tissues, tomato roots were pre-  
269 treated with the lipopeptide before inoculation with *B. velezensis*. As expected, it did not  
270 impacted subsequent colonization in terms of rate and dynamics compared to untreated  
271 plants indicating the absence of potential adverse effects on the bacterial partner (Fig. 6i).



## 273 **Concluding remarks**

274           A large part of the interactions between bacteria and plants is known to be mediated  
275 by small-size secreted products [50]. However, a better understanding of the chemical cross-  
276 talk at the plant-bacteria interface and its impact on bacterial ecology, plant fitness and  
277 immune responses remains challenging. In epiphytic soil bacilli, root exudates induce  
278 expression of an array of genes involved in various functions such as chemotaxis and  
279 nutrient acquisition [51-53]. Our data further illustrate that utilization of this cocktail of  
280 molecules released by roots but also the perception of some cell wall polymers may also  
281 drive these bacteria to efficiently produce key components of the secondary metabolome  
282 and more specifically the multifunctional surfactin lipopeptide [20]. As an amphiphilic  
283 molecule and powerful biosurfactant, surfactin is presumably viewed as membrane active  
284 compound with potent antimicrobial activity. However, this lipopeptide is poorly  
285 antibacterial and antifungal [54]. In *B. velezensis*, more obvious ecological functions of this  
286 CLP are to contribute to motility, biofilm formation and roots colonization. An enhanced  
287 production upon host perception thus constitutes a major force driving successful  
288 rhizosphere establishment.

289           Homogalacturonan acts as a cue to enhance surfactin secretion by bacterial cells but  
290 no transcriptional induction of the corresponding biosynthesis operon was observed.  
291 Surfactin synthesis is integrated in a complex network involving several pleiotropic  
292 regulators acting directly or indirectly on the expression of the *urfA* operon [55-58]. However,  
293 we hypothesize that surfactin induction by HG may rather rely on post-transcriptional  
294 changes as reported for the effect of the DegU and YczE regulators on production of another  
295 CLP, bacillomycin D [59]. Despite the relatively close genetic proximity of the two species, our  
296 data suggest that regulation of surfactin could be slightly different in *B. velezensis* and *B.*  
297 *subtilis*. As it represents a key infochemical devoted to cross-talk with the host plant,  
298 surfactin regulation may have been fine-tuned in rhizosphere species to better fit with the  
299 nutritional or more broadly ecological context.

300           Deciphering the mechanism by which *B. velezensis* recognizes pectin and enhances  
301 surfactin production would help to identify candidate genes and pathways that are  
302 responsible for plant sensing, ensuring persistence on roots which globally remains very  
303 poorly known for beneficial rhizobacteria. We are currently investigating whether some cell

304 surface proteins may act as receptors for homogalacturonan perception and binding as  
305 recently described for *Sphingomonas* sp. [60], another beneficial species living in association  
306 with plants [61]. Some insights could be obtained by scrutinizing the few genes conserved in  
307 *B. velezensis* but missing in non-plant-associated *B. amyloliquefaciens* strains that are not  
308 responsive to pectin [62]. Interestingly, shorter fragments of HG and galacturonic acid do not  
309 stimulate surfactin secretion. It is therefore tempting to hypothesize that sensing unaltered  
310 polymer could indicate a healthy host suitable for bacterial colonization while the perception  
311 of monomers or low DP oligomers may reflect a dead or infected plant that is unable to  
312 adequately provide resources.

313 Our data illustrate for the first time that *B. velezensis* can also modulate qualitatively  
314 its surfactin pattern by growing in its natural nutritional context, *i.e.* on root exudates.  
315 Substitution of leucine by valine in the peptide part is not expected to impact the  
316 contribution of the lipopeptide to colonization by the producing strain itself considering the  
317 minor effect of these structural changes on motility and biofilm formation potential [18].  
318 Small modifications in the peptide sequence may nevertheless avoid surfactin hijacking for  
319 use as signal prompting heterologous biofilm formation by closely related competitor  
320 species [18]. Based on our observations, the most obvious benefit of an increased proportion  
321 of long fatty acid chain homologues is for the host plant since they represent the most active  
322 forms for priming immunity with no impact on host fitness [20,39], by contrast with PTI [63,64].  
323 As the bacterial partner does not have to face strong defensive responses from this reaction,  
324 it ensures positive mutualistic co-habitation allowing establishment of populations on roots.  
325 Persistence of threshold populations is necessary for consistent production of other  
326 specialized secondary metabolites more directly involved in warding off both microbial  
327 competitors and plant soilborne pathogens in the context of biocontrol.

328 Surfactin stimulation upon sensing host molecular patterns may thus reflect an  
329 aspect of plant-*Bacillus* coevolution as it makes a shared good out of this multifunctional  
330 lipopeptide. To some extent, it might represent a facet of the plant-driven selection process  
331 resulting in active recruitment of this bacterium as species that provides beneficial functions.  
332 Other bacterial genera such as *Pseudomonas* also prevailing in the rhizosphere microbiome  
333 actively produce CLPs with similar roles as surfactin. Evaluating whether their synthesis is  
334 also modulated by plant cues would conceptually allow broadening the significance of these

335 lipopeptide-mediated inter-kingdom interactions for bacterial ecology, plant health and  
336 biocontrol.  
337

## 338 **Methods**

339 **Bacterial media and growth conditions.** Cultures were performed at 26°C in root exudates  
340 mimicking medium (EM)<sup>[27]</sup> or in LB medium. To test the effect of plant cell wall polymers,  
341 each specific plant polysaccharide was added at a final concentration of 0.1% in the culture  
342 medium. Low (HGLM, <5%) and high (HGHM, >95%) methylated homogalacturonan were  
343 provided from Elicityl Oligotech whereas oligogalacturonides and D-galacturonic acid were  
344 provided from Sigma.

345 **Strains construction.** All the bacteria strains used in this study are listed in Supplementary  
346 table 3. All the primers used in this study are available upon request. To follow the  
347 expression level of the *srf* operon in GA1, we constructed a *gfp* transcriptional fusion under  
348 the control of the *srf* promoter and integrated it into the *amyE* locus. First, a GA1 *amyE*  
349 amplicon containing a native *KasI* restriction site was integrated in the PGEMT easy. In  
350 parallel, a *cat-gfp* cassette containing respectively (i) a chloramphenicol resistance gene (*cat*)  
351 and (ii) a promoterless *gfpmut3.1* gene was amplified with primers containing *KasI* sites at  
352 their 5' extremities using the pGFP star as a matrix <sup>[65]</sup>. The pGEMT *amyE* plasmid and the  
353 *cat-gfp* amplicon were both digested by *KasI* (NEB) and the two linear fragments with  
354 compatible 5' overhangs were ligated together to obtain the PGEMT *amyEup-cat-gfp-*  
355 *amyEdw* plasmid. To construct the final mutation cassette, an overlap extension PCR was  
356 assessed by following the method developed by Bryksin and Matsumura <sup>[66]</sup>. One first  
357 fragment containing the upper *amyE* homologous region and the *cat* gene, and one second  
358 fragment englobing the *gfpmut3.1* gene and the lower *amyE* homologous region were both  
359 amplified using the PGEMT *amyEup-cat-gfp-amyEdw* plasmid as a matrix. A third fragment  
360 was amplified using GA1 genome as matrix with chimeric primers designed to obtain a *srf*  
361 promoter amplicon flanked by 20 bp connectors in 5' and 3' containing respectively  
362 homologies to the upper and lower *amyE* fragments. All three fragments were joined  
363 together with a second PCR race to obtain the final cassette. *B. velezensis* GA1  
364 transformation was performed after modification from the protocol developed by Jarmer  
365 *et al.* <sup>[67]</sup>. Briefly, one colony was inoculated into LB liquid medium at 37°C (160 rpm) during  
366 6h and cells were washed two times with peptone water. Until 1µg of the recombinant  
367 cassette was added to the GA1 cells suspension adjusted to an OD<sub>600nm</sub> of 0.01 into MMG  
368 liquid medium (19 g l<sup>-1</sup> K<sub>2</sub>HPO<sub>4</sub> anhydrous; 6 g l<sup>-1</sup> KH<sub>2</sub>PO<sub>4</sub>; 1 g l<sup>-1</sup> Na<sub>3</sub> citrate anhydrous; 0.2

369 g l<sup>-1</sup> MgSO<sub>4</sub> 7H<sub>2</sub>O; 2 g l<sup>-1</sup> Na<sub>2</sub>SO<sub>4</sub>; 50 μM FeCl<sub>3</sub> (sterilized by filtration at 0.22 μm); 2μM  
370 MnSO<sub>4</sub>; 8 g l<sup>-1</sup> Glucose; 2 g l<sup>-1</sup> L-glutamic acid; pH 7.0). Cells were incubated at 37°C with  
371 shaking, and colonies who integrated the cassette by a double crossing over event were  
372 selected on LB plate supplemented with chloramphenicol. Proper integration of the *cat-gfp*  
373 locus was verified by PCR. Knock-out mutant strains were constructed by gene replacement  
374 by homologous recombination. A cassette containing a chloramphenicol resistance gene  
375 flanked respectively by 1 kb of the upstream region and 1 kb of the downstream region of  
376 the targeted gene was constructed by a three partners overlap PCR. This recombination  
377 cassette was also introduced in *B. velezensis* GA1 by inducing natural competence as  
378 described above [67]. Double homologous recombination event was selected by  
379 chloramphenicol resistance. Deletion was confirmed by PCR analysis with the corresponding  
380 upstream and downstream primers.

381 **Fluorescence measurement.** Fluorescence accumulation was evaluated thanks to the  
382 channel FL1 of a BD accuri C6 flow cytometer (Biosciences) with the following parameters:  
383 20000 events, medium flow rate (35 μl.min<sup>-1</sup>), FSC threshold of 20000.

384 **Genome sequencing.** GA1 genome sequence was reconstructed using a combined approach  
385 of two sequencing technologies which generated short paired end reads and long reads. The  
386 resulted sequences were then used for hybrid assembly. More precisely, genomic DNA was  
387 extracted and purified from *B. velezensis* GA1 using the GeneJET Genomic DNA purification  
388 (ThermoFisher scientific). First half of extracted DNA was sent to the GIGA sequencing  
389 facility (Liège, Belgium), and use as DNA template for illumina MiSeq sequencing after being  
390 prepared using nextera library kit illumina. Sequencing run generated 150 bp paired-end  
391 read, which were trimmed and corrected using an in-house python script and SPAdes 3.14  
392 [68] before assembly. The second half of extracted DNA was used to generate long reads with  
393 a MinION Oxford nanopore platform. DNA library was constructed using the Rapid  
394 Sequencing kit (SQK-RAD0004, Oxford nanopore). Adapters were trimmed from generated  
395 reads with Porechop software (<https://github.com/rrwick/Porechop>). Trimmed reads were  
396 then filtered by size (>500) and Q-score (>10) using NanoFilt implemented in NanoPack [69].  
397 Finally, hybrid assembly was performed using hybridSPAdes algorithm implemented in  
398 SPAdes 3.14 [70].



399 **Transcriptome library preparation and sequencing.** RNA extraction was performed for each  
400 sample using the NucleoSpin RNA kit (Macherey-Nagel). Total RNAs were quantified using  
401 Nanodrop (ThermoFisher). For sequencing, all samples were sent to the GIGA-genomics  
402 platform in Liège. Quality was assessed using the RNA 6000 Nano Chip on a 2100 Bioanalyzer  
403 (Agilent). cDNA libraries were prepared employing Universal Prokaryotic RNA-Seq,  
404 Prokaryotic AnyDeplete kit (Nugen) according to the manufacturer's instructions, with .  
405 cDNA libraries were quantified and normalized by using the KAPA SYBR Fast Mastermix  
406 (Sigma-Aldrich) with P5-P7 Illumina primers according to the manufacturer's instructions.  
407 Prepared libraries were sequenced on a NextSeq 550 device (Illumina) by using the following  
408 parameters : paired end, 80 cycles read 1, 8 cycles index, 80 cycles read 2.

409 **RNA-seq data analysis.** The raw RNA-seq reads were trimmed using Trimmomatic v0.39 [71].  
410 We performed quality control on the trimmed reads using FastQC v0.11.8 (Babraham  
411 Bioinformatics). Trimmed reads were mapped to the GA1 reference genome (see section  
412 "genome sequencing" for accession numbers) using BWA-mem v0.7.17 [72] with the  
413 following settings: mem -k 50 -B 40 -v 1. At least 95.4% of reads uniquely mapped to the  
414 annotated reference genome (Supplementary table 4). SAMtools v1.9 [73] was used to  
415 generate the BAM files and their indices. To calculate the read counts, the python-based tool  
416 HTSeq v0.9 [74] was employed with the following parameters: htseq-count -q -s no -f. The  
417 Cufflinks function cuffnorm [75] was used to generate the FPKM (fragments per kilobase of  
418 transcript per million mapped reads) tables using the following settings: --compatible-hits-  
419 norm --library-norm-method classic-fpkm. Genes with low reads counts (<25) were removed  
420 before further analysis. Differential expression analysis was conducted according to the  
421 DESeq2 pipeline (10.1186/s13059-014-0550-8) with cut-off parameters of  $p < 0.05$  and  $\log_2$ -  
422 fold-change  $> 1.5$ .

423 **Motility and biofilm assays.** Swarming motility assays were performed according to  
424 Molinatto *et al.* 2017 [76]. Diameter of the bacterial swarming pattern was measured 48h  
425 after inoculation on REM soft agar plates (0.8% agar) supplemented or not with 0.1% HGLM.  
426 Quantification of total biofilm was performed by crystal violet staining. Strain of interest was  
427 inoculated at a final  $OD_{600}$  of 0.1 in a 96 wells microplate containing 200  $\mu$ l of REM medium  
428 supplemented or not with 0.1 % HGLM. The plate was incubated at 30°C during 24h without  
429 shaking. Medium and planktonic cells were discarded and wells were washed with PBS.

430 Biofilm pellicle was stained with 0.1% crystal violet during 10 min and washed with PBS. The  
431 stained biofilm was dissolved with 30% acetic acid. Absorbance was measured at 595 nm.

432 **Plant growth conditions and roots colonization assays.** For sterilization, tomato seeds were  
433 first immersed in a 70% ethanol solution during 2 minutes, transferred in a 20% bleach  
434 solution under shaking for 20 minutes and rinsed three times with sterile water. Sterilized  
435 tomato seeds were pre-germinated on solid Hoagland medium at 22°C under a 16h/8h  
436 night/day cycle. After 4 days, 5µL of cultures containing the strain of interest and calibrated  
437 at OD<sub>600</sub>=1 were deposited on the root top. After 1 and 3 days of colonization, roots were  
438 harvested, deposited separately in a peptone water solution supplemented with 0.1% of  
439 Tween, and vortexed vigorously to tear off the bacterial cells from the roots. Several  
440 dilutions were plated on LB media to evaluate the level of colonization. Measurements of  
441 surfactin production by GA1 cells colonizing roots were performed on 1x1x0.7 cm pieces of  
442 gelified medium containing roots based on the assumption that the produced lipopeptide  
443 diffused to a maximal distance of 5 mm from each part of the root and is uniformly  
444 distributed over the surface as we previously observed via imaging-MS [77]. A 10-fold  
445 concentration factor was applied to estimate concentrations around the root surface in  
446 order to take into account diffusion constraints in a solid matrix. Surfactin was quantified by  
447 UPLC-MS as described below.

448 **Plant cell wall extraction.** Tobacco seeds were sterilized as described above for tomato  
449 seeds and deposited on Hoagland plates at 22°C during one week for a successful  
450 germination process. Each plantlet was then transferred in a seedholder filled with soft agar  
451 and put in Araponics boxes containing the nutritive solution described above. Cell wall  
452 extraction was performed on 6 weeks old plants grown at 22°C with a 16h/8h day-night  
453 alternance. Roots were harvested, lyophilized and reduced to powder using a Retsch MM400  
454 grinder. 500 mg of powder was resuspended in 40 ml of ethanol 80% at 90°C for 20 min. The  
455 insoluble cell wall fraction was recovered by centrifugation and the pellet obtained was  
456 washed once with water to obtain the Alcoholic Insoluble Residue (AIR) used for  
457 fractionation. AIR was freeze-dried before use in fractionation protocol. Sequential  
458 extraction of root cell walls was performed using a protocol derived from Carpita [78] and  
459 Silva *et al.* [79]. Dry AIR was resuspended in 40 ml water and incubated at 100°C for 20 min.  
460 Supernatant was recovered after centrifugation as a soluble pectic fraction (cPEC).

461 **LC-MS analyses.** Detection of metabolites and quantification was performed by LC-MS. 10  $\mu$ L  
462 of samples were analyzed using UPLC–MS with UPLC (Acquity H-class, Waters) coupled to a  
463 single quadrupole mass spectrometer (SQD mass analyzer, Waters) using an C18 column  
464 (Acquity UPLC BEH C18 2.1 mm  $\times$  50 mm, 1.7  $\mu$ m). Elution was performed at 40°C with a  
465 constant flow rate of 0.6 mL/min using a gradient of Acetonitrile (solvent B) and water  
466 (solvent A) both acidified with 0.1% formic acid as follows: starting at 15% B during 2 min,  
467 solvent B was then raised from 15% to 95% in 5 min and maintained at 95% up to 9.5 min  
468 before going back to initial conditions at 9.8 min during 3 minutes before next injection if  
469 needed. Compounds were detected in electrospray positive ion mode by setting SQD  
470 parameters as follows: source temperature 130°C; desolvation temperature 400°C, and  
471 nitrogen flow: 1000 L.h<sup>-1</sup> with mass range from m/z 800 to 1550. Surfactins were quantified  
472 based on their retention times and masses compared to commercial standards (98% purity,  
473 Lipofabrik).

474 **Induction of systemic resistance and ROS measurements.** ISR assays were performed as  
475 previously described [<sup>39</sup>] on 4 weeks-old tobacco plants cultivated in hydroponic conditions  
476 using Hoagland solution as nutrient base. Plants were treated with pure surfactin at the root  
477 level and infected on leaves by applying a spore suspension of the phytopathogen *Botrytis*  
478 *cinerea* prepared as detailed previously [<sup>39</sup>]. Spreading lesions occurred starting from 48h  
479 post-infection and the diameter size was measured two days later. Five plants were used per  
480 treatment and experiments were repeated independently at least twice. For determination  
481 of cytoplasmic ROS stimulation, fluorescent probe (DCFH-DA) was used. Plants used in this  
482 experiment were grown on Hoagland medium for two weeks as described above.  
483 Experiments were performed on nine samples per treatment each containing three root  
484 segments (approx 100 mg FW) collected from different plants (n=9). Roots were treated with  
485 50  $\mu$ M DCFH-DA for 10 minutes, rinsed with PBS upon removing the probe, and finally  
486 treated. All the operations were conducted in a 96-well black microplate. Fluorescence  
487 measurements were performed on a Spark (Tecan) microplate reader (exc 485 nm; em =  
488 535 nm) with readings every 10 minutes. Stimulation of apoplastic hydrogen peroxide  
489 production in root cells was measured via chemiluminescence (ferricyanide-catalysed  
490 oxidation of luminol). Means and standard deviations were calculated from measurements  
491 performed on three samples per treatment, each containing three root segments

492 (approximately 100 mg FW) collected from different plants. Extracellular ROS in tomato  
493 roots was conducted according to Bisceglia *et al.* [<sup>80</sup>] with minor changes. Namely, instead of  
494 leaf discs, tomato roots, three segments (approximately 100 mg FW from the same plant)  
495 per sample, were used. Plants were grown for two weeks on Hoagland medium, and  
496 chemiluminescence was measured in Tecan Spark plate reader.

497 **ITC analysis.** ITC analyses were performed with a VP-ITC Microcalorimeter (Microcal). The  
498 calorimeter cell (volume of 1.4565 mL) was filled with a 10  $\mu$ M (below the CMC  
499 concentration) surfactin solution in buffer (Tris 10mM, NaCl 150mM, 1mM EDTA at pH 8.5).  
500 The syringe was filled with a suspension of LUV at a lipid concentration of 5 mM. A series of  
501 10 $\mu$ l injections was performed at constant time intervals (6 min) at 25°C. The solution in the  
502 titration cell was stirred at 305 RPM. Prior to each analysis, all solutions were degassed using  
503 a sonicator bath. The heats of dilution of vesicles were determined by injecting vesicles in  
504 buffer and subtracted from the heats determined in the experiments. Data were processed  
505 by software Origin 7 (Originlab) using the cumulative model described by Heerklotz and  
506 Seelig [<sup>81</sup>]. All measurements were repeated at least three times with two different vesicle  
507 preparations.

508 **Leakage assays.** Membrane permeabilization was followed as described by Van Bambeke *et*  
509 *al.* [<sup>82</sup>]. Release of 8-hydroxypyrene-1,3,6 trisulfonic acid (HPTS) coentrapped with and  
510 quenched by p-xylene-bis-pyridinium bromide (DPX) from liposomes can be monitored by  
511 the fluorescence increase upon dilution following their leakage from the vesicles. Surfactin  
512 C12 or Surfactin C14 was added from a stock solution in DMSO and fluorescence intensities  
513 were immediately recorded. The percentage of HPTS released was defined as  $[(F_t - F_{\text{contr}}) / (F_{\text{tot}} - F_{\text{contr}})] / 100$ , where  $F_t$  is the fluorescence signal measured after 15 min in the  
514 presence of Surfactin C12 or Surfactin C14,  $F_{\text{contr}}$  is the fluorescence signal measured at the  
515 same time for control liposomes, and  $F_{\text{tot}}$  is the total fluorescence signal obtained after  
516 complete disruption of the liposomes by 0.05% Triton X-100. All fluorescence determinations  
517 were performed at room temperature on a Perkin Elmer LS-50B Fluorescence  
518 Spectrophotometer (Perkin-Elmer Ltd.) using  $\lambda_{\text{exc}}$  of 450 nm and a  $\lambda_{\text{em}}$  of 512 nm.

520 **Statistical analyses.** All statistical analyses were performed on GraphPad prism. Before each  
521 statistical analysis, variance homoscedasticity was verified by using a Brown-Forsythe test.  
522 ANOVA analysis was used for multiple comparison and significant differences were indicate

523 by different letters. Statistical differences between means were evaluated by two-tailed  
524 Student's t-test. Number or biological replicates used for each experiment are indicated in  
525 the corresponding figure legend. P-Values are indicated in the figure legends.

526

527 **Data availability**

528 The RNA-seq datasets produced for this study are deposited at <https://www.ebi.ac.uk/ena/>  
529 under the project reference PRJEB39762. All other datasets analyzed for this study are  
530 included in the supplementary files. The Genome Resulting assembly of the GA1 strain was  
531 deposited in the GenBank database under the accession numbers CP046386 and CP046387.

532

533 **Acknowledgment**

534 This work was supported by the EU Interreg V France-Wallonie-Vlaanderen portfolio  
535 SmartBiocontrol (Bioprotect and Bioscreen projects, avec le soutien du Fonds européen de  
536 développement régional - Met steun van het Europees Fonds voor Regionale Ontwikkeling),  
537 by the PDR research project ID 26084552 from the F.R.S.-FNRS (National fund for Scientific  
538 Research in Belgium) and by the EOS project ID 30650620 from the FWO/F.R.S.-FNRS. FB is  
539 recipient of a F.R.I.A. fellowship (Formation à la Recherche dans l'Industrie et l'Agriculture)  
540 and MO is senior research associate at the F.R.S.-F.N.R.S. We are grateful to the KU Leuven  
541 HPC infrastructure and the Flemish Supercomputer Center (VSC) for providing the  
542 computational resources and services to perform the RNA-seq analysis. We gratefully  
543 acknowledge Claire Bertrand and Loïc Ongena for critically reading the manuscript.

544

545

## 546 Bibliography

- 547 1. Andrews, J. H. & Harris, R. F. The Ecology and Biogeography of Microorganisms on Plant  
548 Surfaces. *Annu. Rev. Phytopathol.* **38**, 145–80 (2000).
- 549 2. Zhalnina, K. *et al.* Dynamic root exudate chemistry and microbial substrate preferences drive  
550 patterns in rhizosphere microbial community assembly. *Nat. Microbiol.* **3**, 470–480 (2018).
- 551 3. Vieira, S. *et al.* Drivers of the composition of active rhizosphere bacterial communities in  
552 temperate grasslands. *ISME J.* **14**, 463–475 (2020).
- 553 4. Vacheron, J. *et al.* Plant growth-promoting rhizobacteria and root system functioning. *Front.*  
554 *Plant Sci.* **4**, 1–19 (2013).
- 555 5. Backer, R. *et al.* Plant growth-promoting rhizobacteria: Context, mechanisms of action, and  
556 roadmap to commercialization of biostimulants for sustainable agriculture. *Frontiers in Plant*  
557 *Science* vol. 871 (2018).
- 558 6. Pieterse, C. M. J. *et al.* Induced Systemic Resistance by Beneficial Microbes. *Annu. Rev.*  
559 *Phytopathol.* **52**, 347–375 (2014).
- 560 7. Köhl, J., Kolnaar, R. & Ravensberg, W. J. Mode of action of microbial biological control agents  
561 against plant diseases: Relevance beyond efficacy. *Front. Plant Sci.* **10**, 1–19 (2019).
- 562 8. van Loon, L. C., Bakker, P. A. H. M. & Pieterse, C. M. J. Systemic Resistance Induced By  
563 Rhizosphere Bacteria. *Annu. Rev. Phytopathol.* **36**, 453–483 (1998).
- 564 9. Ongena, M. *et al.* Surfactin and fengycin lipopeptides of *Bacillus subtilis* as elicitors of induced  
565 systemic resistance in plants. *Environ. Microbiol.* **9**, 1084–1090 (2007).
- 566 10. Ongena, M. & Jacques, P. *Bacillus* lipopeptides: versatile weapons for plant disease biocontrol.  
567 *Trends Microbiol.* **16**, 115–125 (2008).
- 568 11. Wu, K. *et al.* Pectin enhances bio-control efficacy by inducing colonization and secretion of  
569 secondary metabolites by *Bacillus amyloliquefaciens* SQY 162 in the rhizosphere of tobacco.  
570 *PLoS One* **10**, 1–17 (2015).
- 571 12. Saxena, A. K., Kumar, M., Chakdar, H., Anuroopa, N. & Bagyaraj, D. J. *Bacillus* species in soil as  
572 a natural resource for plant health and nutrition. *J. Appl. Microbiol.* **128**, 1583–1594 (2020).
- 573 13. Chen, X. H. *et al.* Comparative analysis of the complete genome sequence of the plant growth-  
574 promoting bacterium *Bacillus amyloliquefaciens* FZB42. *Nat. Biotechnol.* **25**, 1007–1014  
575 (2007).



- 576 14. Chen, X. H. *et al.* Genome analysis of *Bacillus amyloliquefaciens* FZB42 reveals its potential for  
577 biocontrol of plant pathogens. *J. Biotechnol.* **140**, 27–37 (2009).
- 578 15. Molinatto, G. *et al.* Complete genome sequence of *Bacillus amyloliquefaciens* *subsp.*  
579 *plantarum* S499, a rhizobacterium that triggers plant defences and inhibits fungal  
580 phytopathogens. *J. Biotechnol.* **238**, 56–59 (2016).
- 581 16. van Gestel, J., Vlamakis, H. & Kolter, R. From Cell Differentiation to Cell Collectives: *Bacillus*  
582 *subtilis* Uses Division of Labor to Migrate. *PLoS Biol.* **13**, 1–29 (2015).
- 583 17. López, D., Vlamakis, H., Losick, R. & Kolter, R. Paracrine signaling in a bacterium. *Genes Dev.*  
584 **23**, 1631–1638 (2009).
- 585 18. Aleti, G. *et al.* Surfactin variants mediate species-specific biofilm formation and root  
586 colonization in *Bacillus*. *Environ. Microbiol.* **18**, 2634–2645 (2016).
- 587 19. Pršić, J. & Ongena, M. Elicitors of Plant Immunity Triggered by Beneficial Bacteria. *Front. Plant*  
588 *Sci.* **11**, 1–12 (2020).
- 589 20. Debois, D. *et al.* Plant polysaccharides initiate underground crosstalk with bacilli by inducing  
590 synthesis of the immunogenic lipopeptide surfactin. *Environ. Microbiol. Rep.* **7**, 570–582  
591 (2015).
- 592 21. Gage, D. J. Infection and Invasion of Roots by Symbiotic, Nitrogen-Fixing Rhizobia during  
593 Nodulation of Temperate Legumes. *Microbiol. Mol. Biol. Rev.* **68**, 280–300 (2004).
- 594 22. Beauregard, P. B., Chai, Y., Vlamakis, H., Losick, R. & Kolter, R. *Bacillus subtilis* biofilm  
595 induction by plant polysaccharides. *Proc. Natl. Acad. Sci. U. S. A.* **110**, E1621-30 (2013).
- 596 23. Fan, B. *et al.* *Bacillus velezensis* FZB42 in 2018: The gram-positive model strain for plant  
597 growth promotion and biocontrol. *Front. Microbiol.* **9**, 1–14 (2018).
- 598 24. Mohnen, D. Pectin structure and biosynthesis. *Curr. Opin. Plant Biol.* **11**, 266–277 (2008).
- 599 25. Lombard, V., Golaconda Ramulu, H., Drula, E., Coutinho, P. M. & Henrissat, B. The  
600 carbohydrate-active enzymes database (CAZy) in 2013. *Nucleic Acids Res.* **42**, 490–495 (2014).
- 601 26. Fan, B., Blom, J., Klenk, H. P. & Borriss, R. *Bacillus amyloliquefaciens*, *Bacillus velezensis*, and  
602 *Bacillus siamensis* Form an ‘Operational Group *B. amyloliquefaciens*’ within the *B. subtilis*  
603 species complex. *Front. Microbiol.* **8**, 22 (2017).
- 604 27. Nihorimbere, V. *et al.* Impact of rhizosphere factors on cyclic lipopeptide signature from the  
605 plant beneficial strain *Bacillus amyloliquefaciens* S499. *FEMS Microbiol. Ecol.* **79**, 176–191  
606 (2012).

- 607 28. Chen, Y. *et al.* Biocontrol of tomato wilt disease by *Bacillus subtilis* isolates from natural  
608 environments depends on conserved genes mediating biofilm formation. *Environ. Microbiol.*  
609 **15**, 848–864 (2013).
- 610 29. Grau, R. R. *et al.* A duo of potassium-responsive histidine kinases govern the multicellular  
611 destiny of *Bacillus subtilis*. *MBio* **6**, 1–16 (2015).
- 612 30. Thérien, M. *et al.* Surfactin production is not essential for pellicle and root-associated biofilm  
613 development of *Bacillus subtilis*. *Biofilm* **2**, 100021 (2020).
- 614 31. Vlamakis, H., Chai, Y., Beaugregard, P., Losick, R. & Kolter, R. Sticking together: Building a  
615 biofilm the *Bacillus subtilis* way. *Nat. Rev. Microbiol.* **11**, 157–168 (2013).
- 616 32. Caramori, T., Barillà, D., Nessi, C., Sacchi, L. & Galizzi, A. Role of FlgM in  $\sigma$ D-dependent gene  
617 expression in *Bacillus subtilis*. *J. Bacteriol.* **178**, 3113–3118 (1996).
- 618 33. Strieker, M., Tanović, A. & Marahiel, M. A. Nonribosomal peptide synthetases: Structures and  
619 dynamics. *Curr. Opin. Struct. Biol.* **20**, 234–240 (2010).
- 620 34. Süssmuth, R. D. & Mainz, A. Nonribosomal Peptide Synthesis—Principles and Prospects.  
621 *Angew. Chemie - Int. Ed.* **56**, 3770–3821 (2017).
- 622 35. Diomandé, S. E., Nguyen-The, C., Guinebretière, M. H., Broussolle, V. & Brillard, J. Role of fatty  
623 acids in *Bacillus* environmental adaptation. *Front. Microbiol.* **6**, 1–20 (2015).
- 624 36. Serror, P. & Sonenshein, A. L. CodY is required for nutritional repression of *Bacillus subtilis*  
625 genetic competence. *J. Bacteriol.* **178**, 5910–5915 (1996).
- 626 37. Dhali, D. *et al.* Genetic engineering of the branched fatty acid metabolic pathway of *Bacillus*  
627 *subtilis* for the overproduction of surfactin C14 isoform. *Biotechnol. J.* **12**, 1–10 (2017).
- 628 38. Brinsmade, S. R., Kleijn, R. J., Sauer, U. & Sonenshein, A. L. Regulation of CodY activity through  
629 modulation of intracellular branched-chain amino acid pools. *J. Bacteriol.* **192**, 6357–6368  
630 (2010).
- 631 39. Cawoy, H. *et al.* Plant Defense Stimulation by Natural Isolates of *Bacillus* Depends on Efficient  
632 Surfactin Production. *Mol. Plant-Microbe Interact.* **27**, 87–100 (2014).
- 633 40. Saijo, Y., Loo, E. P. iian & Yasuda, S. Pattern recognition receptors and signaling in plant–  
634 microbe interactions. *Plant J.* **93**, 592–613 (2018).
- 635 41. Waszczak, C., Carmody, M. & Kangasjärvi, J. Reactive Oxygen Species in Plant Signaling. *Annu.*  
636 *Rev. Plant Biol.* **69**, 209–236 (2018).

- 637 42. Mignolet-Spruyt, L. *et al.* Spreading the news: Subcellular and organellar reactive oxygen  
638 species production and signalling. *J. Exp. Bot.* **67**, 3831–3844 (2016).
- 639 43. Ashtamker, C., Kiss, V., Sagi, M., Davydov, O. & Fluhr, R. Diverse subcellular locations of  
640 cryptogein-induced reactive oxygen species production in tobacco bright yellow-2 cells. *Plant*  
641 *Physiol.* **143**, 1817–1826 (2007).
- 642 44. Bigeard, J., Colcombet, J. & Hirt, H. Signaling mechanisms in pattern-triggered immunity (PTI).  
643 *Mol. Plant* **8**, 521–539 (2015).
- 644 45. Jourdan, E. *et al.* Insights into the defense-related events occurring in plant cells following  
645 perception of surfactin-type lipopeptide from *Bacillus subtilis*. *Mol. Plant-Microbe Interact.* **22**,  
646 456–468 (2009).
- 647 46. Henry, G., Deleu, M., Jourdan, E., Thonart, P. & Ongena, M. The bacterial lipopeptide surfactin  
648 targets the lipid fraction of the plant plasma membrane to trigger immune-related defence  
649 responses. *Cell. Microbiol.* **13**, 1824–1837 (2011).
- 650 47. Zipfel, C. & Oldroyd, G. E. D. Plant signalling in symbiosis and immunity. *Nature* **543**, 328–336  
651 (2017).
- 652 48. Schellenberger, R. *et al.* Apoplastic invasion patterns triggering plant immunity: plasma  
653 membrane sensing at the frontline. *Mol. Plant Pathol.* **20**, 1602–1616 (2019).
- 654 49. Martinez-Medina, A. *et al.* Recognizing Plant Defense Priming. *Trends Plant Sci.* **21**, 818–822  
655 (2016).
- 656 50. Levy, A. *et al.* Genomic features of bacterial adaptation to plants. *Nat. Genet.* **50**, 138–150  
657 (2018).
- 658 51. Fan, B. *et al.* Transcriptomic profiling of *Bacillus amyloliquefaciens* FZB42 in response to maize  
659 root exudates. *BMC Microbiol.* **12**, (2012).
- 660 52. Feng, H. *et al.* Identification of chemotaxis compounds in root exudates and their sensing  
661 chemoreceptors in plant-growth-promoting rhizobacteria *Bacillus amyloliquefaciens* SQR9.  
662 *Mol. Plant-Microbe Interact.* **31**, 995–1005 (2018).
- 663 53. Zhang, N. *et al.* Whole transcriptomic analysis of the plant-beneficial rhizobacterium *Bacillus*  
664 *amyloliquefaciens* SQR9 during enhanced biofilm formation regulated by maize root exudates.  
665 *BMC Genomics* **16**, 1–21 (2015).
- 666 54. Raaijmakers, J. M., de Bruijn, I., Nybroe, O. & Ongena, M. Natural functions of lipopeptides  
667 from *Bacillus* and *Pseudomonas*: More than surfactants and antibiotics. *FEMS Microbiol. Rev.*

- 668           **34**, 1037–1062 (2010).
- 669   55.   Hayashi, K. *et al.* The H<sub>2</sub>O<sub>2</sub> Stress-Responsive Regulator PerR Positively Regulates *srfA*  
670       Expression in *Bacillus subtilis*. **187**, 6659–6667 (2014).
- 671   56.   Wolf, D. *et al.* The quorum-sensing regulator ComA from *Bacillus subtilis* activates  
672       transcription using topologically distinct DNA motifs. *Nucleic Acids Res.* **44**, 2160–2172 (2015).
- 673   57.   Mariappan, A., Makarewicz, O., Chen, X. H. & Borriss, R. Two-component response regulator  
674       DegU controls the expression of bacilysin in plant-growth-promoting bacterium *Bacillus*  
675       *amyloliquefaciens* FZB42. *J. Mol. Microbiol. Biotechnol.* **22**, 114–125 (2012).
- 676   58.   Zhi, Y., Wu, Q. & Xu, Y. Genome and transcriptome analysis of surfactin biosynthesis in  
677       *Bacillus amyloliquefaciens* MT45. *Sci. Rep.* **7**, 1–13 (2017).
- 678   59.   Koumoutsis, A., Chen, X. H., Vater, J. & Borriss, R. DegU and YczE positively regulate the  
679       synthesis of bacillomycin D by *Bacillus amyloliquefaciens* strain FZB42. *Appl. Environ.*  
680       *Microbiol.* **73**, 6953–6964 (2007).
- 681   60.   Konishi, H., Hio, M., Kobayashi, M., Takase, R. & Hashimoto, W. Bacterial chemotaxis towards  
682       polysaccharide pectin by pectin-binding protein. *Sci. Rep.* **10**, 1–12 (2020).
- 683   61.   Muller, D. B., Schubert, O. T., Rost, H., Aebersold, R. & Vorholt, J. A. Systems-level proteomics  
684       of two ubiquitous leaf commensals reveals complementary adaptive traits for phyllosphere  
685       colonization. *Mol. Cell. Proteomics* **15**, 3256–3269 (2016).
- 686   62.   Hossain, M. J. *et al.* Deciphering the conserved genetic loci implicated in plant disease control  
687       through comparative genomics of *Bacillus amyloliquefaciens subsp. plantarum*. *Front. Plant*  
688       *Sci.* **6**, 1–14 (2015).
- 689   63.   Birkenbihl, R. P., Liu, S. & Somssich, I. E. Transcriptional events defining plant immune  
690       responses. *Curr. Opin. Plant Biol.* **38**, 1–9 (2017).
- 691   64.   Huot, B., Yao, J., Montgomery, B. L. & He, S. Y. Growth-defense tradeoffs in plants: A  
692       balancing act to optimize fitness. *Molecular Plant* (2014) doi:10.1093/mp/ssu049.
- 693   65.   Trauth, S. & Bischofs, I. B. Ectopic integration vectors for generating fluorescent promoter  
694       fusions in *Bacillus subtilis* with minimal dark noise. *PLoS One* **9**, (2014).
- 695   66.   Bryksin, A. V. & Matsumura, I. Overlap extension PCR cloning: a simple and reliable way to  
696       create recombinant plasmids. *Biotechniques* **48**, 463–465 (2010).
- 697   67.   Jarmer, H., Berka, R., Knudsen, S. & Saxild, H. H. Transcriptome analysis documents induced  
698       competence of *Bacillus subtilis* during nitrogen limiting conditions. *FEMS Microbiol. Lett.* **206**,

- 699 197–200 (2002).
- 700 68. Bankevich, A. *et al.* SPAdes: A new genome assembly algorithm and its applications to single-  
701 cell sequencing. *J. Comput. Biol.* **19**, 455–477 (2012).
- 702 69. De Coster, W., D’Hert, S., Schultz, D. T., Cruts, M. & Van Broeckhoven, C. NanoPack:  
703 Visualizing and processing long-read sequencing data. *Bioinformatics* **34**, 2666–2669 (2018).
- 704 70. Antipov, D., Korobeynikov, A., McLean, J. S. & Pevzner, P. A. HybridSPAdes: An algorithm for  
705 hybrid assembly of short and long reads. *Bioinformatics* **32**, 1009–1015 (2016).
- 706 71. Bolger, A. M., Lohse, M. & Usadel, B. Trimmomatic: A flexible trimmer for Illumina sequence  
707 data. *Bioinformatics* **30**, 2114–2120 (2014).
- 708 72. Li, H. & Durbin, R. Fast and accurate short read alignment with Burrows-Wheeler transform.  
709 *Bioinformatics* **25**, 1754–1760 (2009).
- 710 73. Li, H. *et al.* The Sequence Alignment/Map format and SAMtools. *Bioinformatics* **25**, 2078–  
711 2079 (2009).
- 712 74. Anders, S., Pyl, P. T. & Huber, W. HTSeq-A Python framework to work with high-throughput  
713 sequencing data. *Bioinformatics* **31**, 166–169 (2015).
- 714 75. Trapnell, C. *et al.* Transcript assembly and abundance estimation from RNA-Seq reveals  
715 thousands of new transcripts and switching among isoforms. *Nat. Biotechnol.* **28**, 511–515  
716 (2011).
- 717 76. Molinatto, G. *et al.* Key impact of an uncommon plasmid on *Bacillus amyloliquefaciens* *subsp.*  
718 *plantarum* S499 developmental traits and lipopeptide production. *Front. Microbiol.* **8**, 1–18  
719 (2017).
- 720 77. Debois, D., Ongena, M., Cawoy, H. & De Pauw, E. MALDI-FTICR MS imaging as a powerful tool  
721 to identify *Paenibacillus* antibiotics involved in the inhibition of plant pathogens. *J. Am. Soc.*  
722 *Mass Spectrom.* **24**, 1202–1213 (2013).
- 723 78. Carpita, N. C. Cell wall development in maize coleoptiles. *Plant Physiol.* **76**, 205–212 (1984).
- 724 79. Silva, G. B. *et al.* Cell wall polysaccharides from fern leaves: Evidence for a mannan-rich Type  
725 III cell wall in *Adiantum raddianum*. *Phytochemistry* **72**, 2352–2360 (2011).
- 726 80. Bisceglia, N., Gravino, M. & Savatin, D. Luminol-based Assay for Detection of Immunity  
727 Elicitor-induced Hydrogen Peroxide Production in *Arabidopsis thaliana* Leaves. *Bio-Protocol* **5**,  
728 (2015).

729 81. Heerklotz, H. & Seelig, J. Titration calorimetry of surfactant-membrane partitioning and  
730 membrane solubilization. *Biochim. Biophys. Acta - Biomembr.* **1508**, 69–85 (2000).

731 82. Van Bambeke, F. *et al.* Biophysical studies and intracellular destabilization of pH-sensitive  
732 liposomes. *Lipids* **35**, 213–223 (2000).

733

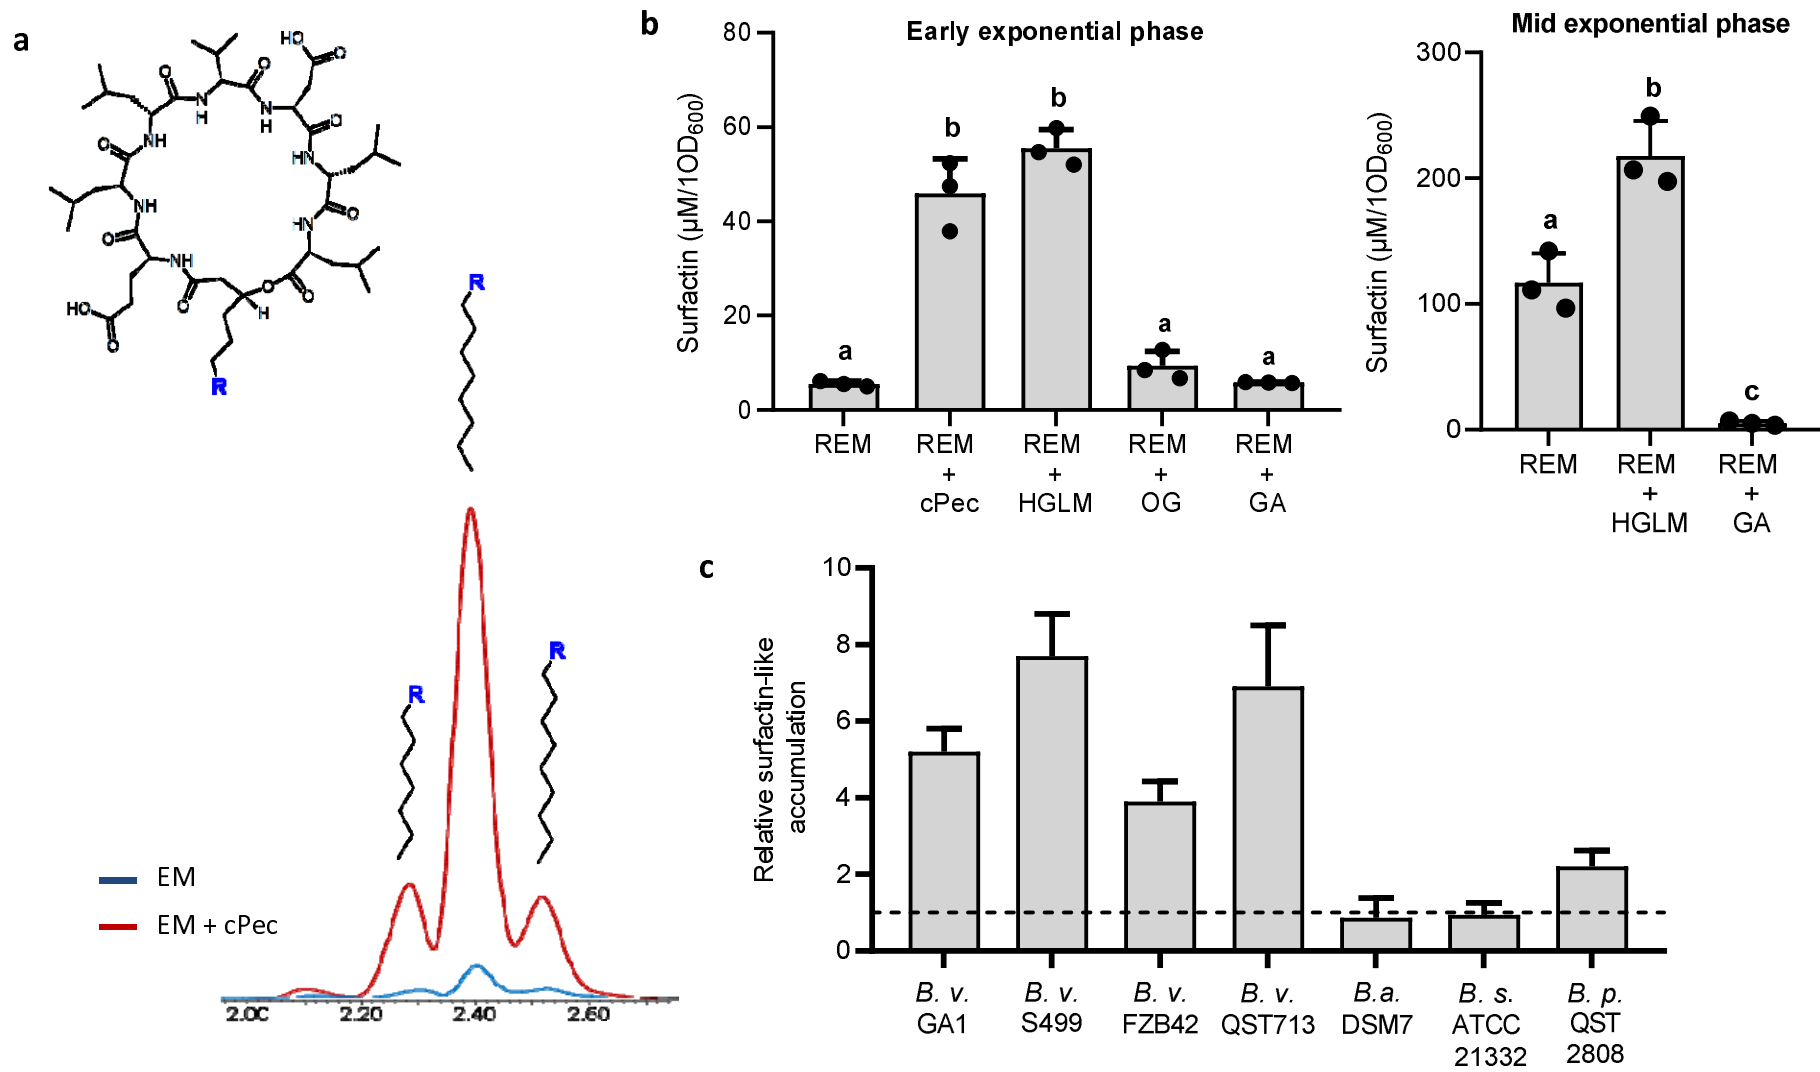

**Figure 1: Impact of pectin on early surfactin production.** **a** Surfactin (cyclic structure represented up) production in a root exudates mimicking (REM) medium at early growth phase ( $OD_{600}=0.2$ ) with (red chromatogram) or without (blue chromatogram) addition of crude pectin extract added to the GA1 cultures. The main peak represents C15 surfactin whereas the minor left and right peaks represents C14 and C16 surfactins, respectively. **b** Surfactin accumulation in the early (left panel,  $OD_{600}=0.2$ ) and mid (right panel,  $OD_{600}=0.35$ ) exponential growth phase of GA1 cultures in REM medium supplemented with different sized pectin fragments : homogalacturonan low methylated (HGLM),  $DP>150$ ; oligogalacturonides (OG),  $DP=15$ ; galacturonic acid (GA),  $DP=1$ . Means  $\pm$  std err. from three biological replicates of one representative experiment are shown. Significant difference between each condition is indicated by different letters, p-value < 0.01. **c** Comparison of surfactin induction level by HGLM in the early exponential growth phase for different *Bacillus* species : *Bacillus velezensis* (*B. v*), *Bacillus amyloliquefaciens* (*B. a*), *Bacillus subtilis* (*B. s*) and *Bacillus pumilus* (*B. p*). For each strain tested, surfactin accumulation was normalized with the control condition without HGLM represented by the black dotted line. Means  $\pm$  std err. from three biological replicates are shown.



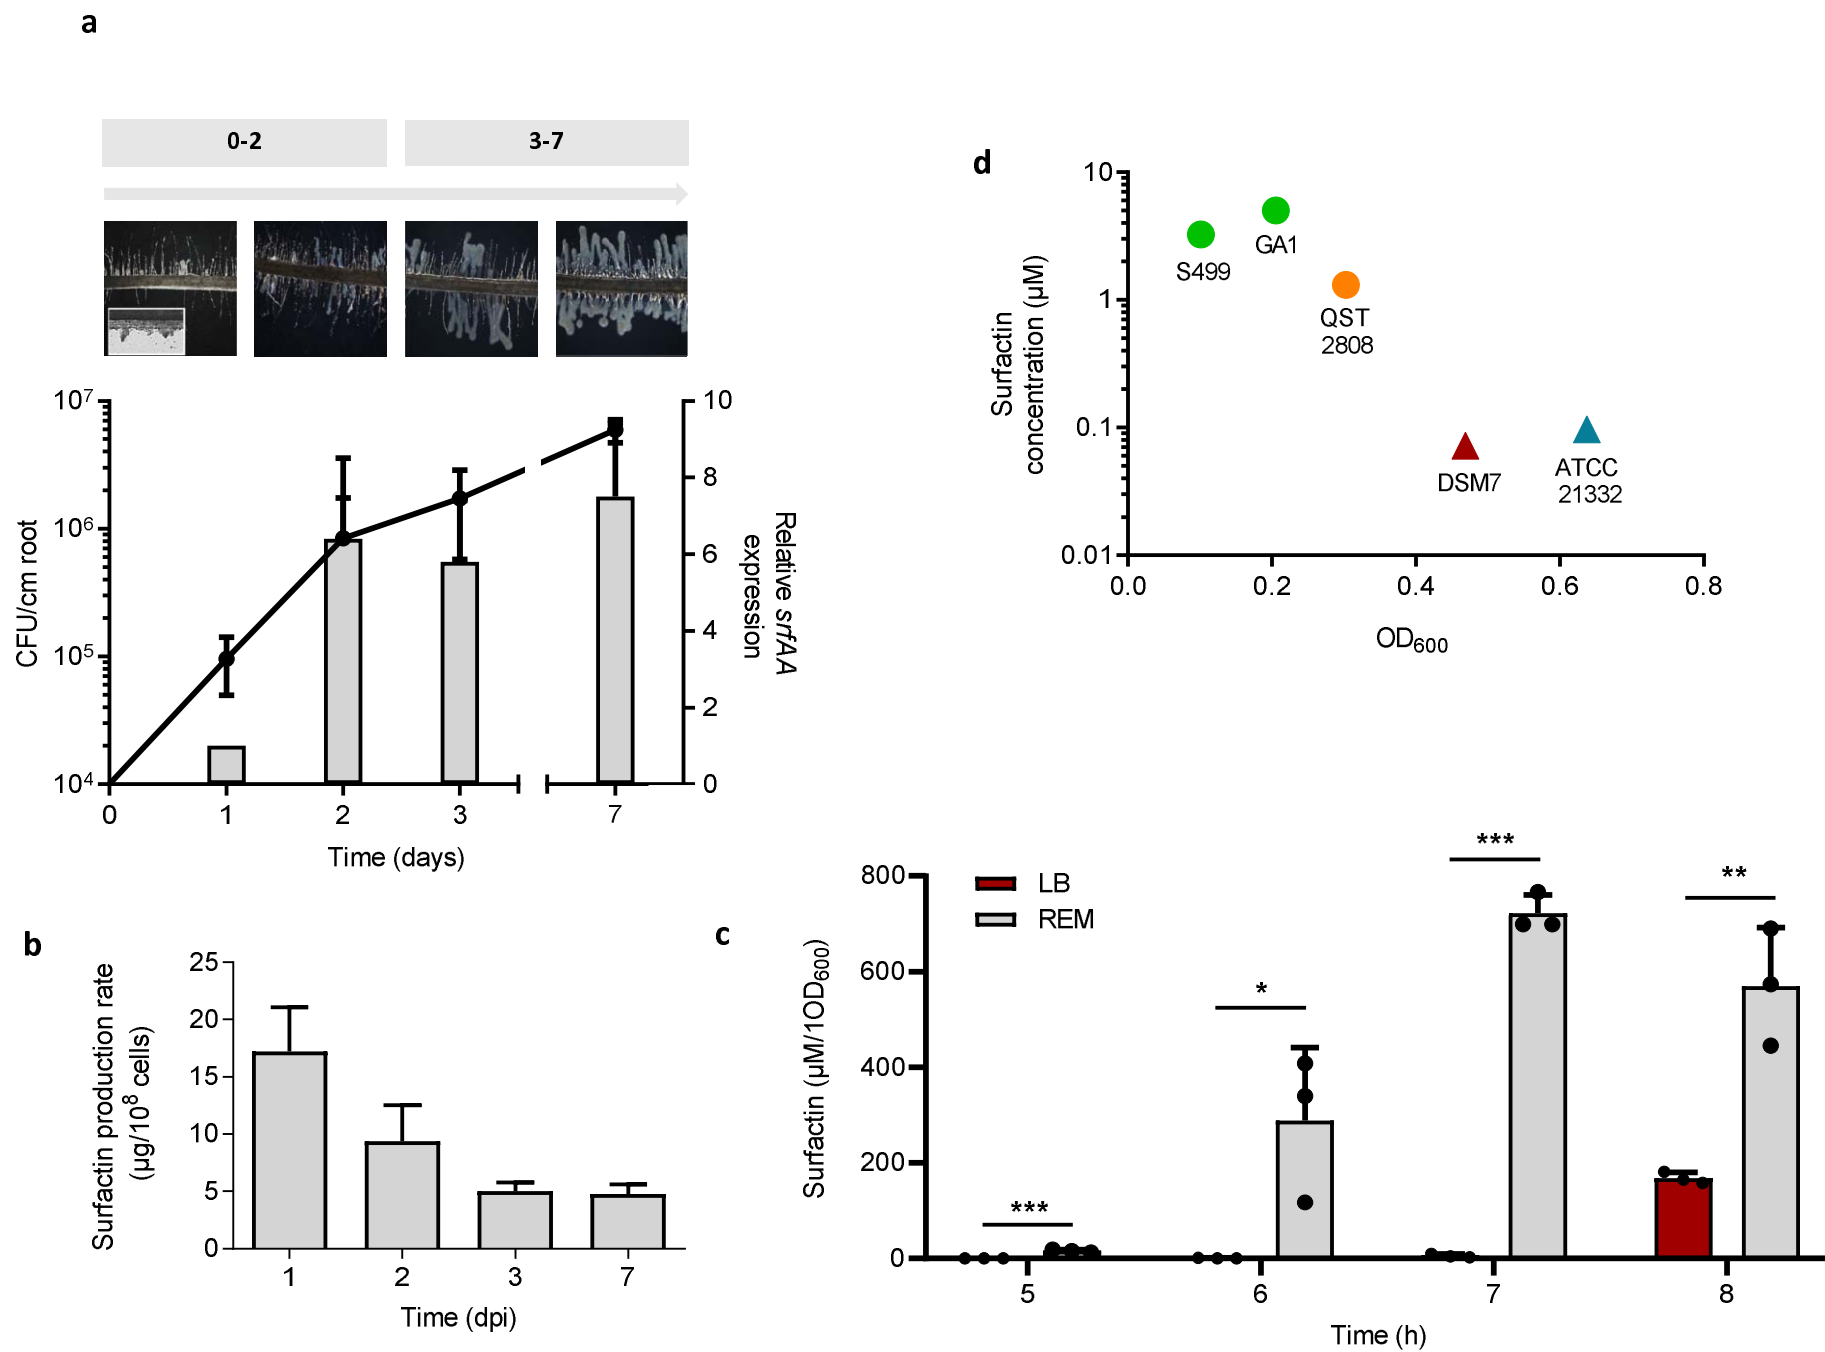

**Figure 2: Impact of the specific rhizosphere nutritional context on early surfactin production.** **a** Evaluation of bacterial population (black line, left axis) and relative *srfAA* expression on roots (grey bars, right axis) in a time frame of seven days post inoculation (dpi). *Bacillus* progression on roots characterized by a biofilm formation was assessed by microscopy at each time point (upper part). **b** Surfactin production rate on roots. Means  $\pm$  std err. from three biological replicates of one representative experiment are shown **c** Surfactin accumulation measured by UPLC-MS in a 8h time course experiment in REM medium (grey bars) compared to LB medium (red bars). Means  $\pm$  std err. from three biological replicates of one representative experiment are shown \*\*\* P-value <0.001, \*\* P-value <0.01, \* P-value <0.05 **d** Comparison of early surfactin accumulation ( $\mu$ M of surfactin on y axis linked to OD<sub>600</sub> on x axis) in different *Bacillus* species, including *B. velezensis* (GA1 and S499 in green), *B. pumilus* (QST 2808 in orange), *B. amyloliquefaciens* (DSM 7 in red) and *B. subtilis* (ATCC 21332 in blue). Circle symbols are representing plant associated bacteria whereas triangle symbols are representing non-plant associated bacteria.

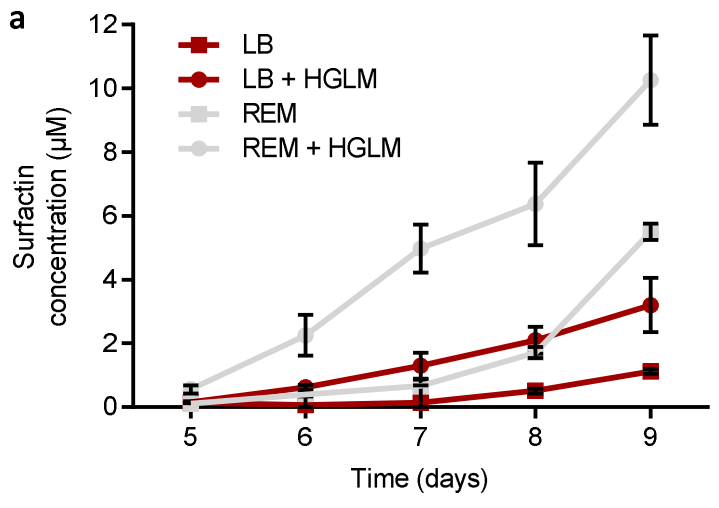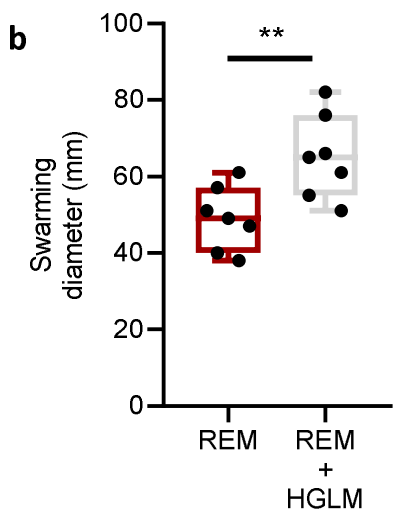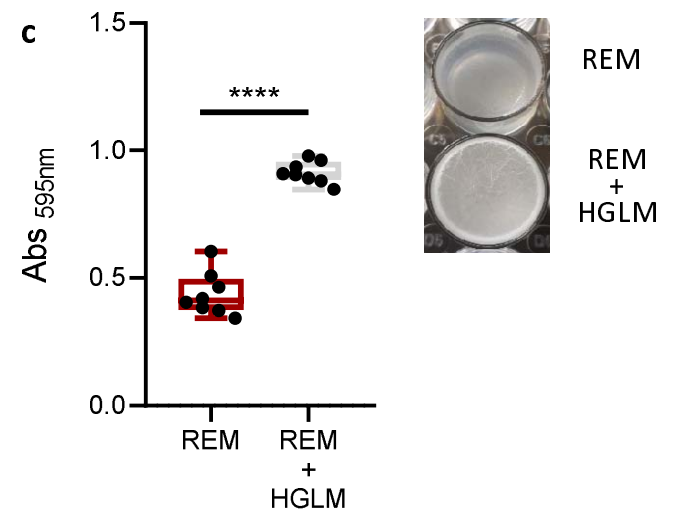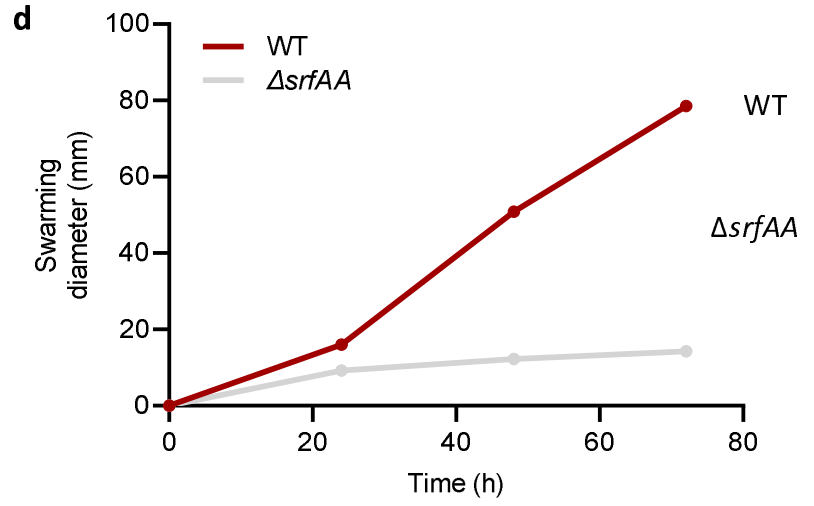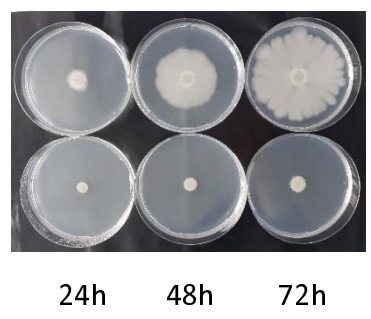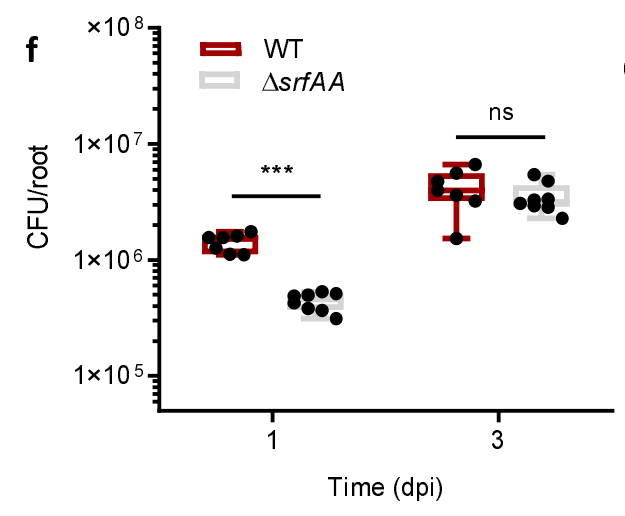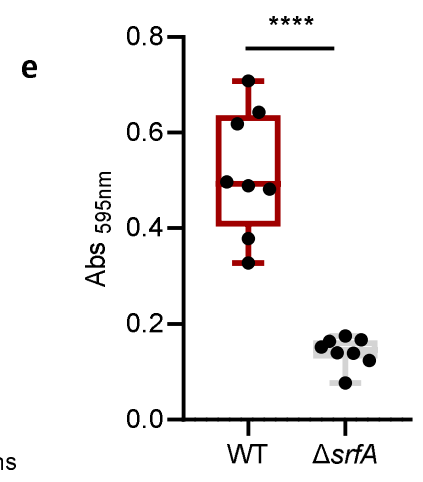

**Figure 3: Ecological importance of an early surfactin accumulation.** **a** Evaluation of HGLM and root exudates synergistic effect on early surfactin production. Time course experiment for surfactin quantification was performed in REM (grey curves) and LB (red curves) medium with (circle symbols) or without (square symbols) addition of HGLM. Means  $\pm$  std err. from three biological replicates of one representative experiment are shown **b** Swarming potential of *B. velezensis* GA1 on soft agar plates after addition of HGLM or not. Means  $\pm$  std err. from seven biological replicates of one representative experiment are shown. **c** Evaluation of *B. velezensis* ability to form pellicles on microwells plates after addition of HGLM or not. Means  $\pm$  std err. from eight biological replicates of one representative experiment are shown. Pellicle formation is illustrated on the right **d** Comparison of *B. velezensis* GA1 WT and (red) and a  $\Delta$ *srfAA* mutant (grey) for their swarming potential in a time course study. Means  $\pm$  std err. from three biological replicates of one representative experiment are shown. Time course study is illustrated right. **e** Comparison of pellicle formation between GA1 WT strain (red) and a  $\Delta$ *srfAA* mutant (grey). Means  $\pm$  std err. from eight biological replicates of one representative experiment are shown \*\*\*\* P-value <0.0001. **f** *In vitro* comparison of root colonization ability of GA1 (red boxes) and GA1  $\Delta$ *srfAA* (grey boxes) on tomato plantlets. Means  $\pm$  std err. from eight biological replicates of one representative experiment are shown \*\*\* P-value <0.001, ns non significant.

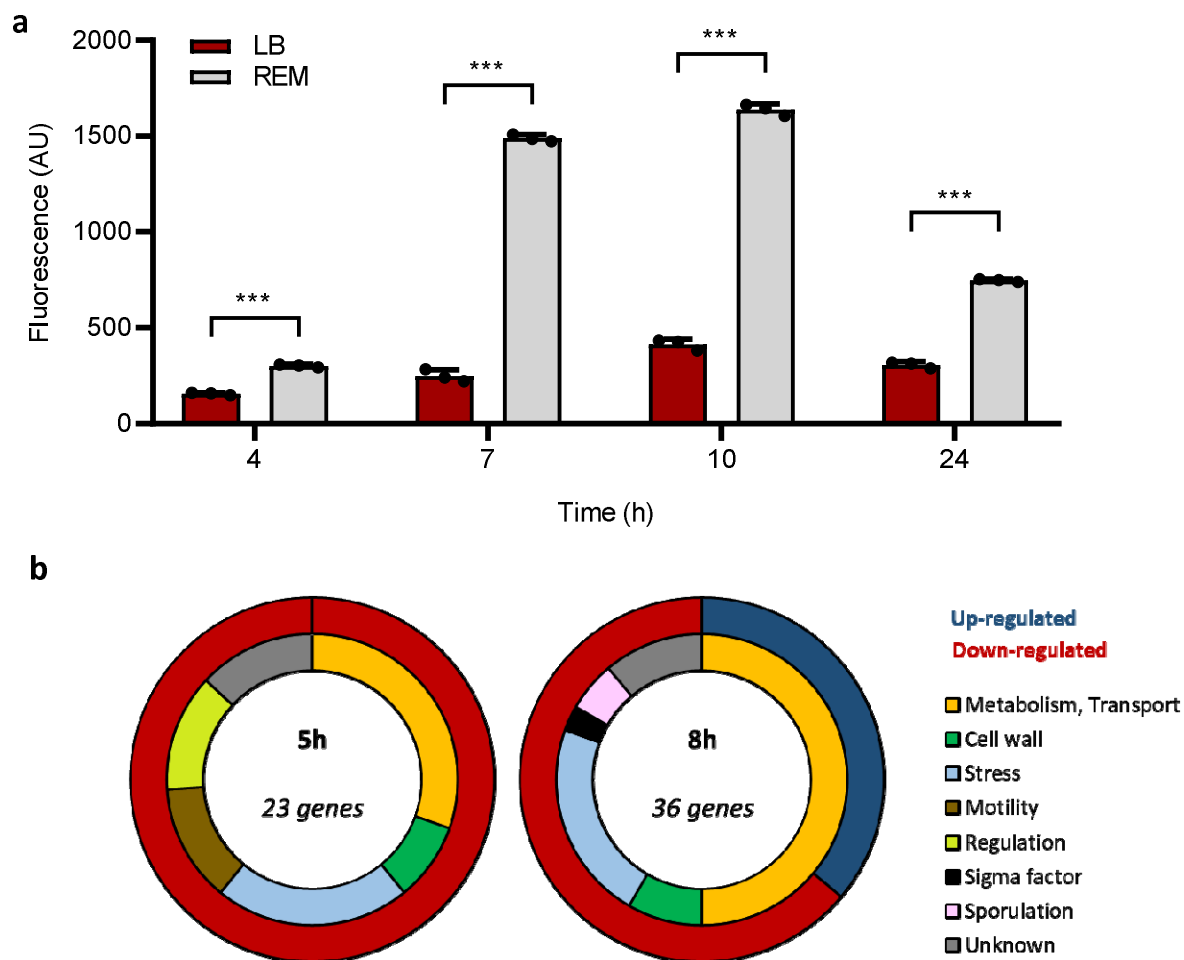

**Figure 4: Impact of plant triggers perception on *Bacillus* transcriptome.** **a** Surfactin expression measured by fluorescence in the GA1 *PsrfAp::gfp* reporter strain in a 24h time course study in EM medium (grey bars) compared to LB medium (red bars). Means  $\pm$  std err. from three biological replicates of one representative experiment are shown \*\*\* P-value < 0.001. **b** Classification of the different genes carrying a significant fold change ( $1.5 \log_2$ ) 5 and 8 hours after addition of HG when compared to the control condition. The outer circle represents the proportion of up (dark blue) and down (red) regulated genes. The inner circle represents the proportion of genes belonging to the different functional family described in the legend.

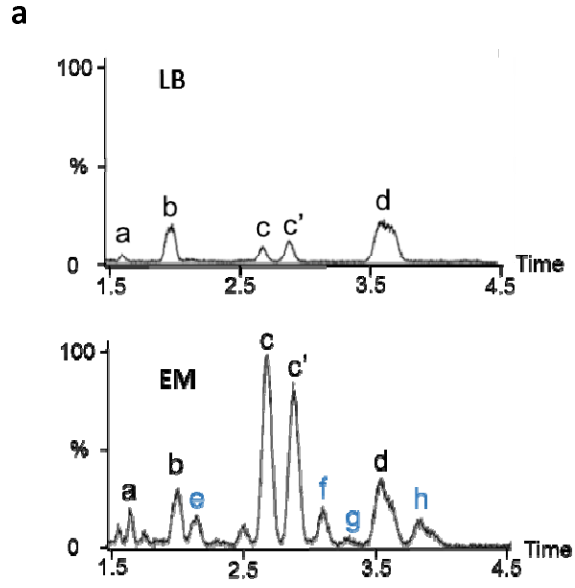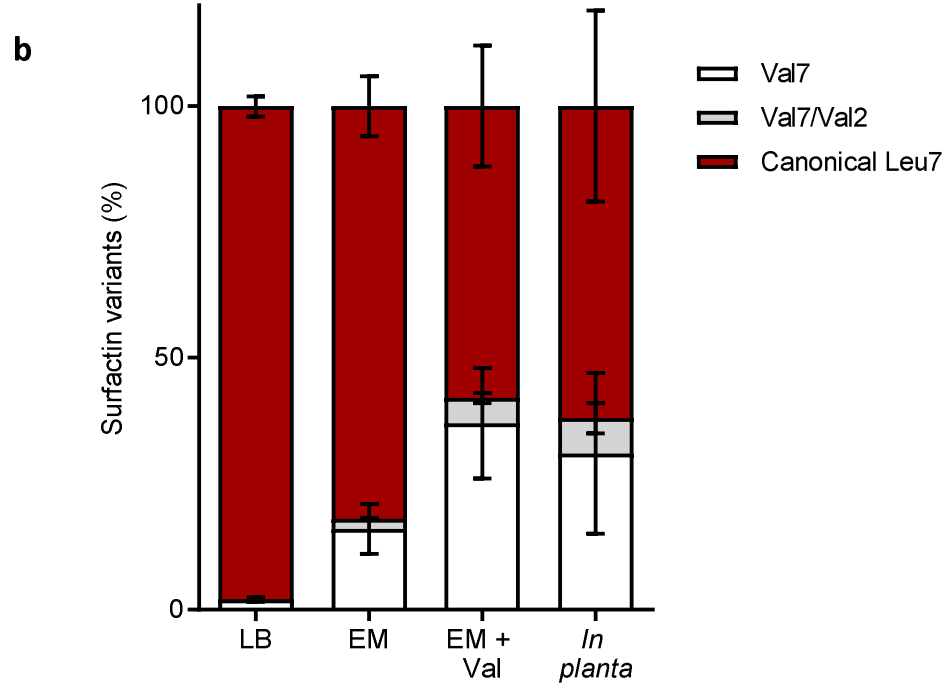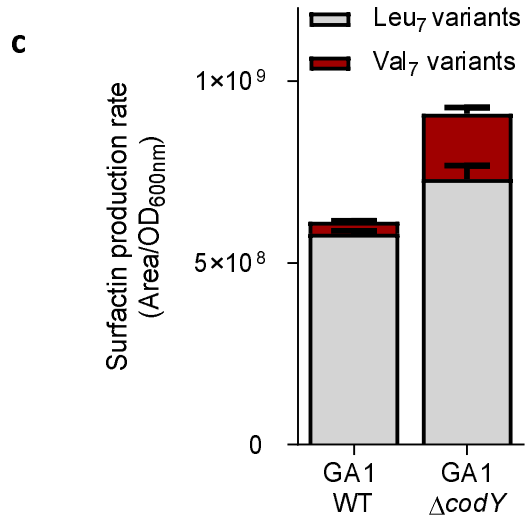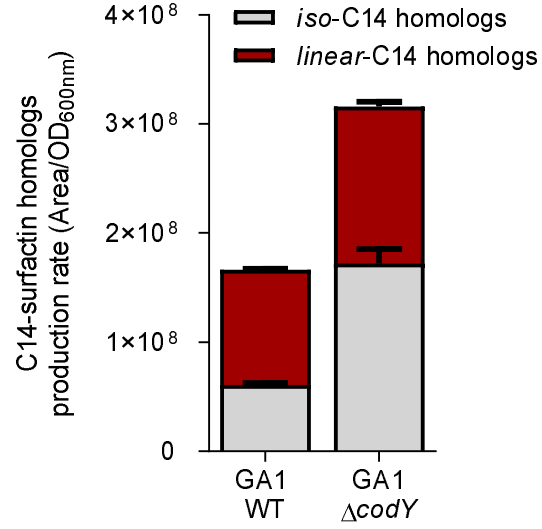

**Figure 5: Qualitative impact of root exudates on surfactin production.** **a** Comparison of surfactin pattern in REM and LB medium. Based on MS-MS analyses, nine different surfactin forms were identified (a: C<sub>12</sub>-Glu-Leu-Leu-Val-Asp-Leu-Leu ; b: C<sub>13</sub>-Glu-Leu-Leu-Val-Asp-Leu-Leu ; c : iso-C<sub>14</sub>-Glu-Leu-Leu-Val-Asp-Leu-Leu ; c' : n-C<sub>14</sub>-Glu-Leu-Leu-Val-Asp-Leu-Leu ; d : C<sub>15</sub>-Glu-Leu-Leu-Val-Asp-Leu-Leu ; e: C<sub>13</sub>-Glu-Leu-Leu-Val-Asp-Leu-Val ; f: C<sub>14</sub>-Glu-Leu-Leu-Val-Asp-Leu-Val ; g: C<sub>14</sub>-Glu-Leu-Leu-Val-Asp-Leu-Val and h: C<sub>14</sub>-Glu-Val-Leu-Val-Asp-Leu-Val.) **b** Relative proportions of surfactin variants in LB, REM, REM supplemented with valine, and *in planta*. **c** Qualitative and quantitative role of CodY on surfactin production. In a WT strain, 95% of the surfactin molecules are carrying a Leu in position 7 (grey bars) and only 5% are carrying a Val (red bars) whereas in  $\Delta codY$  mutant almost 25% of the surfactin molecules are carrying a Val in position 7 and 75% a Leu. In addition, amount of total surfactin production rate of 150 % can be observed in  $\Delta codY$  mutant compared to WT strain. Proportion of iso-C14 is also affected by CodY, 36 % of total C<sub>14</sub> are iso-fatty acid (grey bars) and 64% are linear (red bars) in WT strain whereas in  $\Delta codY$  mutant 55% of C<sub>14</sub> are iso-C<sub>14</sub> and 45 % are linear. Again, total amount of C<sub>14</sub> is higher in  $\Delta codY$  mutant (increase of 190 %).

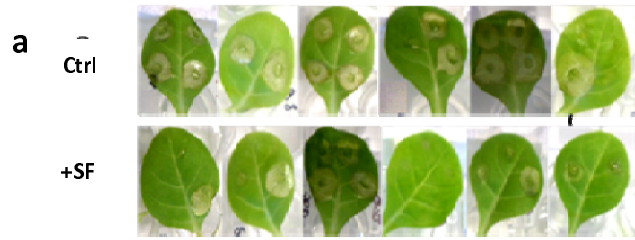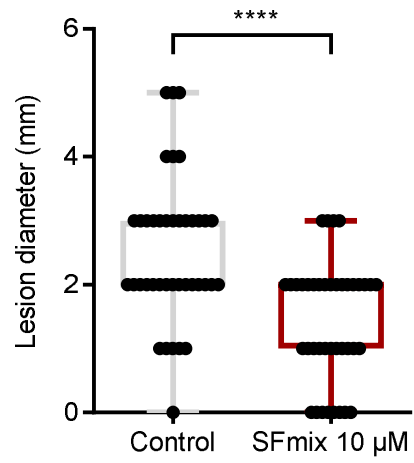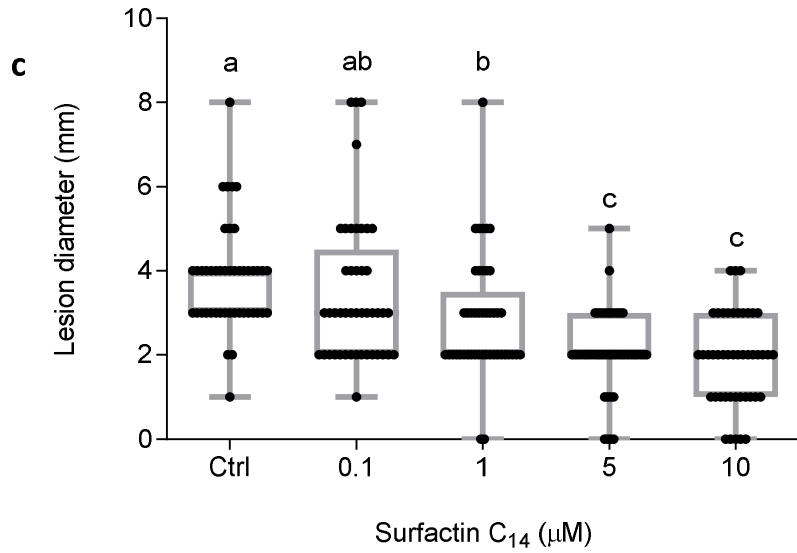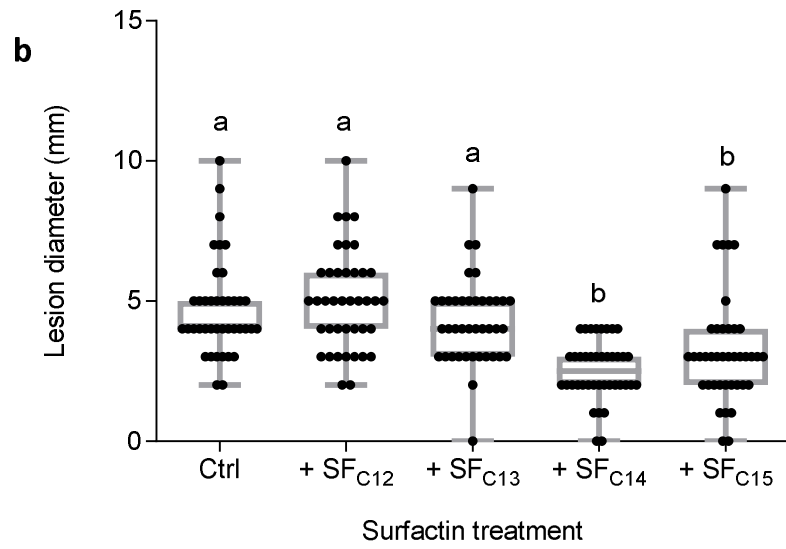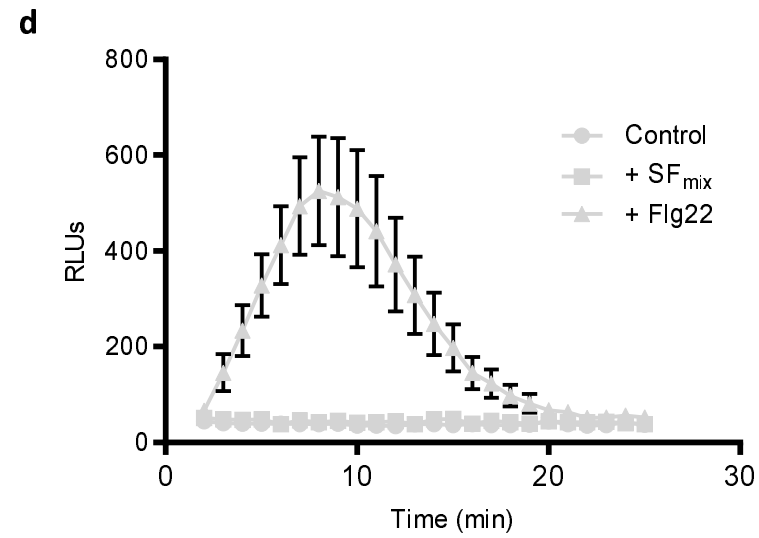



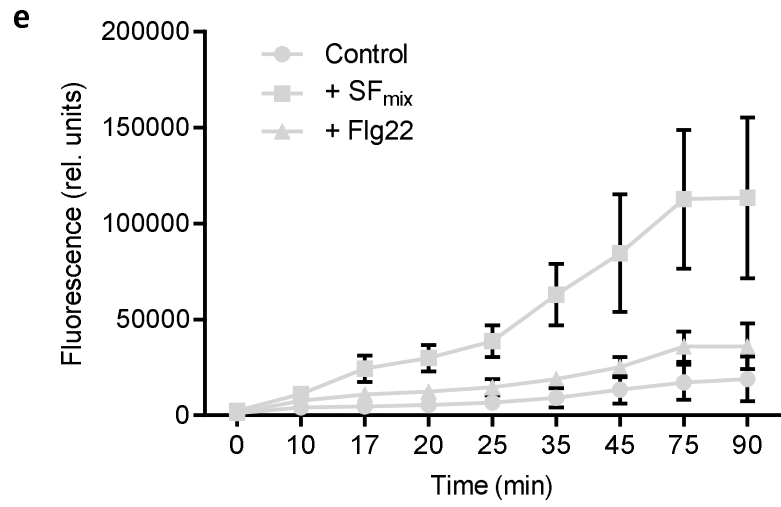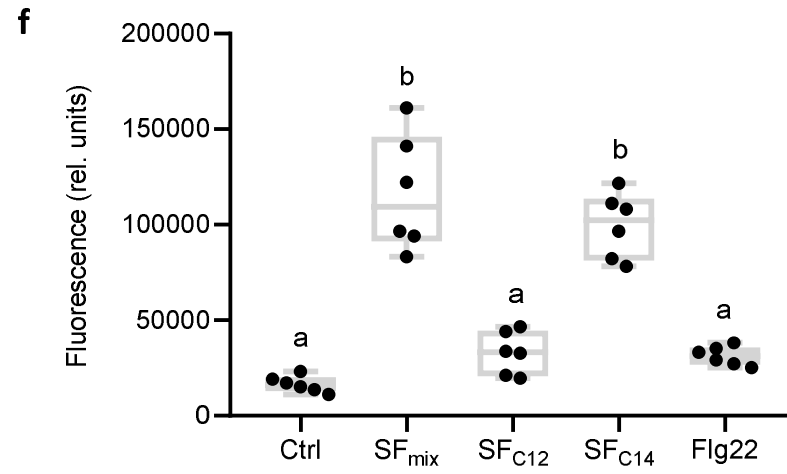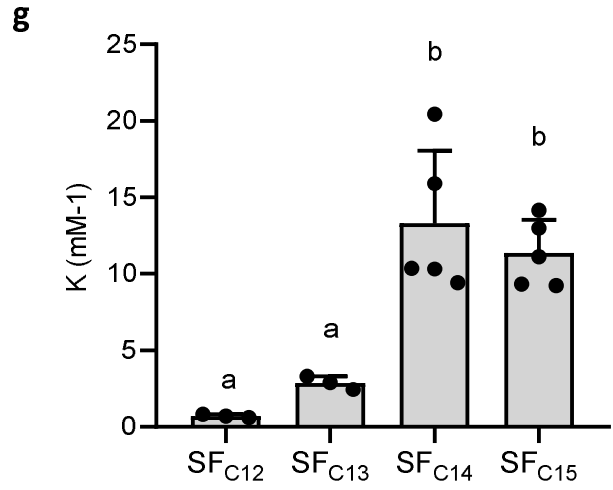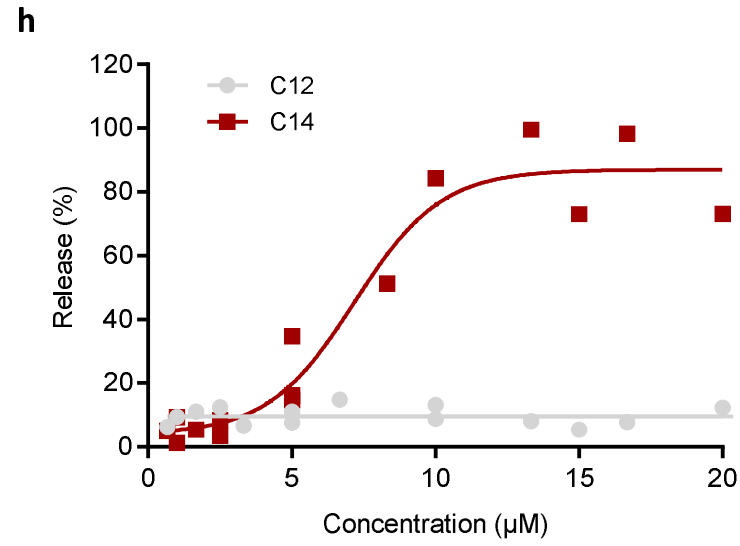

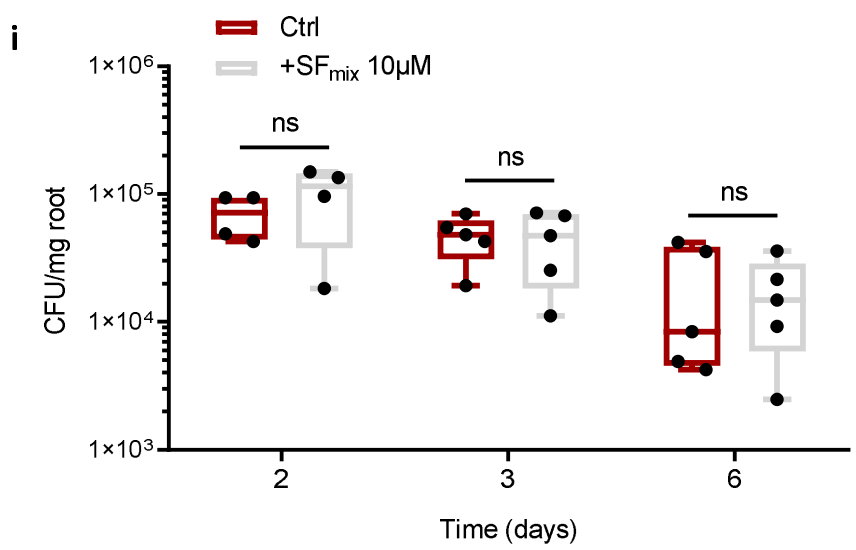

**Figure 6: Impact of surfactin homologues on Solanaceae plant immunity.** **abc** Systemic resistance induced in hydroponically-grown tobacco by surfactin and expressed as reduction of *B. cinerea* infection (illustration of the reduction in the diameter of spreading lesions on infected leaves) in plants treated at the root level prior to pathogen inoculation on leaves compared to control plants. Data represent results grouped from two independent experiments with similar results and each involving 5 plants with 4 lesions on the second leaf (n=40). **a** Effect of surfactin homologues (SF mix) as naturally co-produced by the bacterium (C12/C13/C14/C15 in relative proportions 8/17/33/42%) \*\*\*\* P-value <0.0001 **b** Effect of HPLC-purified surfactin homologues applied at 10  $\mu$ M with fatty acid chains from C12 to C15. Significance difference between each condition is indicated by different letters, p-value < 0.05 **c** Effect of the most active C14 homologue tested at various concentrations. Significance difference between each condition is indicated by different letters, p-value < 0.05 **d**e Stimulation of oxidative burst in root tissues upon treatment with a SF mix and to the response observed by treating roots with flagellin (flg22, 1  $\mu$ M) used as positive control. **d** Stimulation of apoplastic ROS accumulation (DCFH-DA fluorescent probe) in root tissues upon treatment with a surfactin mix applied at 15  $\mu$ M. Means and standard deviations are shown for one representative experiment performed on nine samples per treatment each containing three root segments (approx 100 mg FW) collected from different plants (n=9). Similar trend was obtained in an independent assay. **e** Stimulation of cytoplasmic hydrogen peroxide production in root cells. Means and s.d. were calculated from measurements performed on three samples per treatment each containing three root segments (approx 100 mg FW) collected from different plants. Data represent values obtained from two independent experiments (n=6 per treatment). **f** Stimulation of cytoplasmic hydrogen peroxide production in root cells after treatment with C<sub>12</sub> and C<sub>14</sub> surfactin homologues as representative of short and long fatty acid chains respectively. Flg22 as used as control. Significance difference between each condition is indicated by different letters, p-value < 0.0001. **g** Binding coefficient (K) of Surfactin homologues (C<sub>12</sub> to C<sub>15</sub>) to large unilamellar vesicles (LUV) composed by PLPC/Sitosterol/Glucosylceramide (60:20:20 molar ratio). Means  $\pm$  std err. from three to five biological replicates of one representative experiment are shown Significance difference between each condition is indicated by different letters, p-value < 0.05 **h** Release of 8-hydroxypyrene-1,3,6 trisulfonic acid (HPTS) from PLPC/Sitosterol/Glucosylceramide (60:20:20 molar ratio) LUV, upon addition of surfactin C<sub>12</sub> or C<sub>14</sub> at different concentrations. The ordinate shows the amount of HPTS released after 15 min in the presence of the C<sub>12</sub> or C<sub>14</sub> as a percentage of the total amount released by Triton X-100. **i** Influence of roots pretreatment with 10 $\mu$ M of surfactin (blue boxes) compared to non-treated roots (red boxes) on *B. velezensis* GA1 root colonization. Means  $\pm$  std err. from five biological replicates of one representative experiment are shown. Ns= non significant.
