# Supplementary material for: Surfactin stimulated by pectin molecular patterns and root exudates acts as a key driver of Bacillus-plant mutualistic interaction
Source: bioRxiv or medRxiv preprint supplement (doi:10.1101/2021.02.22.432335), 2021-06-11
Supplement: Supplementary file [file media-1.pdf]

## 1 **Supplementary discussion**

### 2 **The intracellular pools of precursors and the flexibility of the NRP machinery drive surfactin** 3 **variant diversity**

4 Surfactin producing strains are always producing the cLP as a mixture of different  
5 structural variants. Specific amino acids substitution in the peptide as well as differences in  
6 the fatty acid (FA) chain length and branching type represent the main structural variations  
7 found in this mixture of surfactins. Two main factors are found to be involved in this diversity.

8 On one hand, the availability of precursors as well as the balance between these latter  
9 is an important factor that drive the surfactin structural diversity. Indeed, feeding the bacteria  
10 with specific amino acids will result in changes in the ratio between the different variants  
11 (peptidic and lipidic) as well as production of new variants that are not produced in normal  
12 lab conditions [1,2]. Among the important amino acids for surfactin production, isoleucine,  
13 valine and leucine (branched chain amino acids or BCAAs) constitute the major precursors (5  
14 out of 7). The key role of BCAAs is even more important since the branched chain fatty acids  
15 (BCFAs) tail of surfactin biosynthetic pathway also require these BCAAs as precursors for their  
16 biosynthesis. Indeed, Ile, Leu and Val are precursors of odd anteiso-FAs, odd iso-FAs and even  
17 iso FAs, respectively [3]. This makes thus from the BCAAs balance the key factor for most part  
18 of the building blocks of surfactin. Therefore, deciphering the BCAAs biosynthetic pathways  
19 as well as its regulation can bring some clues on what can be involved in the balance changes  
20 of surfactin precursors. Even if the biosynthetic pathways responsible for these three amino  
21 acids share part of the enzyme coding genes (*ilvBCDE*), precursors as well as some additional  
22 genes are specifically involved in the biosynthesis of each BCAA. Ile require Thr and pyruvate  
23 to be synthesized via the action of enzymes encoded by *ilvABCDE*. Val and Leu share the first  
24 part of the transformation of pyruvate into  $\alpha$ -ketoisovalerate thanks to enzymes encoded by  
25 *ilvBCD* genes. This intermediate can be then transformed into Valine via IlvE enzyme or can  
26 further react with acetyl-CoA and undergo enzymatic transformation involving *leuABCD* and  
27 *ilvE* genes to produce Leucine [4]. Regulation of these enzymes is most probably also an  
28 important factor to understand the balance changes that can occur in the precursor's pools.  
29 The pleiotropic regulator has been shown to monitor and regulate the intracellular  
30 concentrations of BCAAs. Indeed, BCAAs (as well as GTPs) can bind to specific pockets of CodY  
31 tetramers and induce structural changes of the regulator that will expose the DNA binding

32 domain of the regulator [5]. By binding to specific DNA sequences, CodY will play a role in the  
33 regulation of hundreds genes, mainly as a repressor, including *ilv* and *leu* genes [6,7].  
34 Interestingly, in *B. subtilis*, derepression of CodY will result only in a slight increase of Leu and  
35 Ile intracellular concentrations (2-fold) but up to 6-fold higher Val concentration as well as 24-  
36 fold increase expression of *ybgE* coding for an enzyme involved in BCFAs biosynthesis [7]. The  
37 reasons of this differential impact of the regulator even if the enzymes are shared in the  
38 biosynthesis of the three amino acids is still unknown. It has been hypothesized that Leu and  
39 Ile can be excreted outside of the cells, or that some CodY-independent regulation is involved  
40 in Leu/Ile regulation.

41 On the other hand, such a diversity in the structure of surfactins produced by a same  
42 strain will never be possible by a ribosomal mode of biosynthesis. The non-ribosomal  
43 machinery that is involved in the selection, activation and elongation of the nascent  
44 lipopeptides is indeed able to add different type of fatty acid as well as amino acids at certain  
45 position of the molecule. The mega enzymatic complex responsible for surfactin production is  
46 mainly composed of 7 seven modules (one per amino acid) that are subdivided into at least 3  
47 specific domains: adenylation (A-domain), condensation (C domain) and PCP (peptidyl-carrier-  
48 protein domain) [8]. Among those, A-domain is known to be responsible for amino acid  
49 selectivity. Indeed, each A-domain show a specific 8 amino acid binding pocket that is able to  
50 interact with a specific amino acid that will be activated and inserted into the peptide via the  
51 action of the C domain [9-12]. It appears that some binding pockets of certain modules can  
52 show differential affinity for more than one amino acid and therefore can lead to the  
53 production of peptidic variants. Similarly, it appears that addition of fatty acid occurring at the  
54 beginning of the surfactin biosynthesis is under the specific selectivity of first C-domain of  
55 surfactin operon [13].

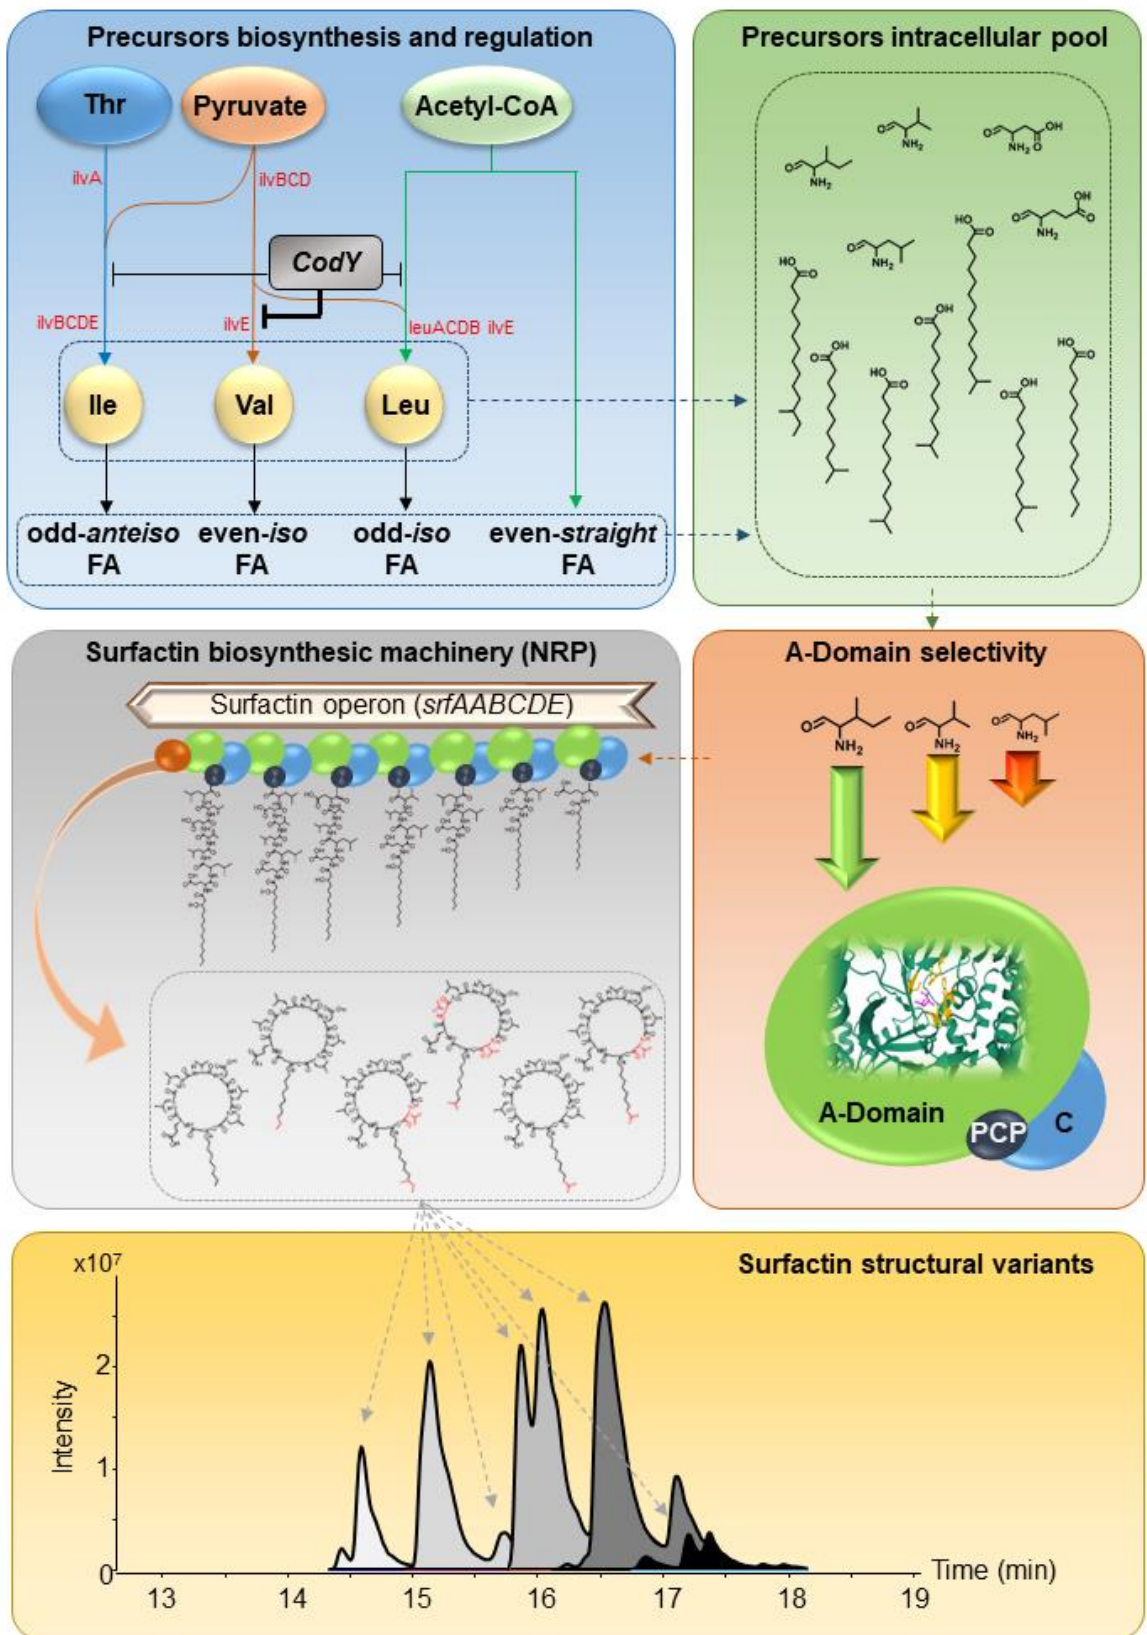

57 **REFERENCES.**

- 58 1. Peypoux, F. & Michel, G. Controlled biosynthesis of Val7- and Leu7-surfactins. *Appl.*  
59 *Microbiol. Biotechnol.* **36**, 515–517 (1992).
- 60 2. Liu, J.-F., Yang, J., Yang, S.-Z., Ye, R.-Q. & Mu, B.-Z. Effects of Different Amino Acids in  
61 Culture Media on Surfactin Variants Produced by *Bacillus subtilis* TD7. *Appl. Biochem.*  
62 *Biotechnol.* **166**, 2091–2100 (2012).
- 63 3. Hu, F., Liu, Y. & Li, S. Rational strain improvement for surfactin production: Enhancing  
64 the yield and generating novel structures. *Microb. Cell Fact.* **18**, 1–13 (2019).
- 65 4. Kaiser, J. C. & Heinrichs, D. E. Branching Out: Alterations in Bacterial Physiology and  
66 Virulence Due to Branched-Chain Amino Acid Deprivation. *MBio* **9**, (2018).
- 67 5. Levdikov, V. M. *et al.* Structure of the branched-chain Amino Acid and GTP-sensing  
68 global regulator, cody, from *Bacillus subtilis*. *J. Biol. Chem.* **292**, 2714–2728 (2017).
- 69 6. Qi, M. *et al.* Function of global regulator CodY in *Bacillus thuringiensis* BMB171 by  
70 comparative proteomic analysis. *J. Microbiol. Biotechnol.* **25**, 152–161 (2015).
- 71 7. Brinsmade, S. R., Kleijn, R. J., Sauer, U. & Sonenshein, A. L. Regulation of CodY activity  
72 through modulation of intracellular branched-chain amino acid pools. *J. Bacteriol.*  
73 **192**, 6357–6368 (2010).
- 74 8. Schwarzer, D., Finking, R. & Marahiel, M. A. Nonribosomal peptides: From genes to  
75 products. *Nat. Prod. Rep.* **20**, 275–287 (2003).
- 76 9. Eppelmann, K., Stachelhaus, T. & Marahiel, M. A. Exploitation of the selectivity-  
77 conferring code of nonribosomal peptide synthetases for the rational design of novel  
78 peptide antibiotics. *Biochemistry* **41**, 9718–9726 (2002).
- 79 10. Challis, G. L., Ravel, J. & Townsend, C. A. Predictive, structure-based model of amino  
80 acid recognition by nonribosomal peptide synthetase adenylation domains. *Chem.*  
81 *Biol.* **7**, 211–224 (2000).
- 82 11. Stachelhaus, T., Mootz, H. D. & Marahiel, M. A. The specificity-conferring code of  
83 adenylation domains in nonribosomal peptide synthetases. *Chem. Biol.* **6**, 493–505  
84 (1999).
- 85 12. Lautru, S. & Challis, G. L. Substrate recognition by nonribosomal peptide synthetase  
86 multi-enzymes. *Microbiology* **150**, 1629–1636 (2004).
- 87 13. Kraas, F. I., Helmetag, V., Wittmann, M., Strieker, M. & Marahiel, M. A. Functional  
88 dissection of surfactin synthetase initiation module reveals insights into the  
89 mechanism of lipoinitiation. *Chem. Biol.* **17**, 872–880 (2010).
